# Supplementary material for: Release of Volatile Per- and Polyfluoroalkyl Substances from Plant Fiber-Based Food Packaging and Municipal Solid Waste to Gas under Simulated Landfill Conditions
Source: PubMed Central journal article supplement (PMC11618979; doi:10.1021/acs.est.4c08544), 2024-11-19

## Supporting Information

### **Release of Volatile Per- and Polyfluoroalkyl Substances from Plant Fiber-based Food Packaging and Municipal Solid Waste to Gas Under Simulated Landfill Conditions**

Yuemei Ye<sup>1,#,\*</sup>, Ivan A. Titaley<sup>2</sup>, Mitchell L. Kim-Fu<sup>2</sup>, Ansel R. Moll<sup>2</sup>, Jennifer A. Field<sup>2</sup> and Morton A. Barlaz<sup>1</sup>

<sup>1</sup>Department of Civil, Construction, and Environmental Engineering, North Carolina State University, Campus Box 7908, Raleigh, North Carolina 27695-7908, United States

<sup>2</sup>Department of Environmental and Molecular Toxicology, Oregon State University, 1007 Agriculture & Life Sciences Building, Corvallis, Oregon 97331, United States

#Current Affiliation: Department of Chemistry, Lehman College, City University of New York, 250 Bedford Park Boulevard West, Bronx, New York 10468, United States

\*Corresponding Author: [yuemei.ye@lehman.cuny.edu](mailto:yuemei.ye@lehman.cuny.edu)

Number of pages: 39

Number of tables: 13

Number of Figure: 16

## List of Tables

|                                                                                                                                                                                               |     |
|-----------------------------------------------------------------------------------------------------------------------------------------------------------------------------------------------|-----|
| <b>Table S1.</b> Fluorine content of food packaging materials as screened by PIGE and GC-MS for total fluorine and 6:2 FTOH, respectively.....                                                | S12 |
| <b>Table S2.</b> Organic content and biochemical methane potential of materials tested in landfill simulation reactors.....                                                                   | S14 |
| <b>Table S3.</b> List of target volatile PFAS analytes for food packaging materials after methanol extraction and for gas sample analysis by TD-GC-MS.....                                    | S15 |
| <b>Table S4.</b> List of 17 suspect volatile PFAS analytes for gas sample analysis.....                                                                                                       | S17 |
| <b>Table S5.</b> List of 52 target ionic PFAS analytes in leachate using liquid chromatography tandem-mass spectrometry (LC-MS/MS) .....                                                      | S18 |
| <b>Table S6.</b> List of 21 target analytes in EPA 537M method used for ionic PFAS background check of the reactor system. Samples were analyzed using LC-MS/MS by SGS North America Inc..... | S21 |
| <b>Table S7.</b> Mass of materials and volume of inoculum added to each reactor and the extent of cellulose and hemicellulose decomposition in each material.....                             | S22 |
| <b>Table S8.</b> Volatile PFAS released in Popcorn Bags 1 reactor after 27 days and Popcorn Bags 2 reactor at day 29 and day 203 (final day) .....                                            | S23 |
| <b>Table S9.</b> Measured 6:2 FTOH concentration ranges in the generated gas for each high F material .....                                                                                   | S23 |
| <b>Table S10.</b> Cumulative volatile PFAS yield in Low F and MSW reactors (ng/g) at the end of the monitoring period. ....                                                                   | S24 |
| <b>Table S11.</b> Cumulative PFAS yield (ng/g) in leachate for all reactors and the ratio of FTCA released in leachate to 6:2 FTOH released to gas phase. ....                                | S25 |
| <b>Table S12.</b> Profile of volatile PFAS and total F for select samples pre- and post-digestion.....                                                                                        | S26 |
| <b>Table S13.</b> Summed PFAS as F released in leachate and ratio of leachate F to gas phase F .....                                                                                          | S27 |

## List of Figures

- Figure S1.** Schematic of the test reactor. **A.** 2L-glass reactor with flange connection part; **B.** drainage layer of pea gravel; **C.** #120 stainless steel woven wire mesh to reduce clogging of the reactor outlet; **D.** glass cap for the reactor with flange connection part; **E.** flange clamps to hold the two-pieces of glass together and keep the system sealed; a 245 EPDM gasket was placed between the two pieces of glass; **F.** stainless steel adjustable clamp; **G.** 10 mL Norm-Ject Luer lock polypropylene syringe; **H.** T-shape plastic 3-way barb fitting, polypropylene, 1/4" OD; **I.** Cole-Parmer female/male Luer hose barb adapter, 1/4" OD; **J.** McMaster quick-disconnect tube couplings, polysulfone, 1/4" OD; **K.** tubing flow control hose clamp, 3/4" OD 54; **L.** stainless steel quick-turn tube couplings, 1/4" OD; **M.** one-way Luer stopcock; **N.** tygon tube, 1/4" ID, flexible, clear, PVC; **O.** 10 L-foil gas bag (SKC. Inc.), **P.** 2L-Thermo Scientific™ Labtainer™ bioProcess container, with 3 Ports, MPC Insert, MPC Body, and Luer lock.....S28
- Figure S2.** Gas sampling system. **A.** 0.5 L-foil gas bag; **B.** check valve; **C.** 160 mL-serum bottle; **D.** H<sub>2</sub>SO<sub>4</sub> aqueous solution (pH <3.7), 1 g/L methyl orange was added as a pH indicator (3.1-4.4); **E.** 18-gauge needles; **F.** rubber stopper to seal serum bottle. **G.** straight adapters, tube push-on barbed hose, 1/4" ID; **H.** Markes Universal gas sampling tube 1/4" OD (IS spiked TD tube); **I.** One-way Luer stopcock. ....S28
- Figure S3.** Measured PFAS concentrations in the Whatman #2 filter paper Control reactors. **A.** Control 1 reactor and **B.** Control 2 reactor .....S29
- Figure S4.** pH of all reactors: **A.** Control and Low F; **B.** MSW; **C.** High F (Natural Plates and Popcorn Bags), and **D.** High F (Compostable Bowls, Biodegradable Boxes, Bagasse Containers, and Eco-friendly Plates) .....S29
- Figure S5.** CH<sub>4</sub> yield in the reactors of **A.** Whatman #2 filter paper control; **B.** MSW; **C.** Popcorn bags, and **D.** High F (Compostable Bowls, Biodegradable Boxes, Bagasse Containers, and Eco-friendly Plates) .....S30
- Figure S6.** CH<sub>4</sub> generation rate (mL/day-dry g) of all reactors: **A.** Control and Low F; **B.** MSW; **C.** High F (Natural Plates and Popcorn Bags), and **D.** High F (Compostable Bowls, Biodegradable Boxes, Bagasse Containers, and Eco-friendly Plates) .....S31
- Figure S7.** The total fluorine concentration of 46 sampled materials (5 popcorn bags sampled in 2022 were not tested by PIGE).....S32
- Figure S8.** Volatile PFAS released from Popcorn Bags 1 reactor during the 27-day monitoring period. PFAS data are presented as a yield. As such, a flat line indicates that no PFAS was detected in a sample. The first gas sampling and detection day was day 12, and concentrations before day 12 are extrapolated .....S33
- Figure S9.** Time-dependent release of volatile PFAS to the gas phase in **A.** Natural Plates a and **B.** Natural Plates b. The summed PFAS and 6:2 FTOH lines overlap in both reactors.....S33
- Figure S10.** Volatile PFAS released from High F reactors. **A.** Compostable Bowls; **B.** Biodegradable Boxes; **C.** Bagasse Containers; **D.** Eco-friendly plates. The summed PFAS and 6:2 FTOH lines overlap in all reactors .....S34

**Figure S11.** Time-dependent release of volatile PFAS in **A.** Low F a, **B.** Low F b, **C.** MSW-August b, and **D.** MSW-May a reactor. The concentration of 7:2-sFTOH was first detected on day 74 for Low F a reactor and day 51 for Low F b reactor, 8:2 FTOH were first detected on day 43 in Low F b reactor, 10:2 FTOH were first detected on day 148 and 43 in Low F a and Low F b reactors; yields of these compounds before first detection were extrapolated. The summed PFAS and 7:2-sFTOH lines overlap in Figure S11C .....S35

**Figure S12.** PFAS concentration and relative abundance in leachate samples over time for the High F reactors: **A&B.** Compostable Bowls, **C&D.** Biodegradable Boxes, **E&F.** Bagasse Containers, **G&H.** Eco-friendly Plates, **I&J.** Popcorn Bags 1, and **K&L.** Popcorn Bags 2.....S36

**Figure S13.** PFAS concentration and relative abundance and CH<sub>4</sub> generation rate in the leachate samples over time for: **A&B.** High F Natural Plates a, **C&D.** High F Natural Plates b, and **E&F.** High F Natural Plates c. The discontinuous reporting of FTCAs concentrations in Natural Plates a could be due to the high LOQ of 5:3 FTCA (2500 ng/L) and 6:2 FTCA (2500 ng/L) .....S37

**Figure S14.** The PFAS concentration and relative abundance of each PFAS component in the leachate samples of **A&B.** Low F a **C&D.** Low F b .....S37

**Figure S15.** The PFAS concentration in the leachate samples of **A.** MSW-May a, **B.** MSW-May b, **C.** MSW-August a, and **D.** MSW-August b. In the case of PFOA, concentrations were 22 to 57% above the highest concentration in a control reactor.....S38

**Figure S16.** **A.** Cumulative summed and individual ionic PFAS released to leachate from each reactor. **B.** The fraction of each PFAS released to the leachate .....S39

1  
2  
3  
4  
5  
6  
7  
8  
9  
10  
11  
12  
13  
14  
15  
16  
17  
18  
19  
20  
21  
22  
23  
24  
25  
26  
27  
28  
29  
30

## Materials and Methods

**Particle Induced Gamma-ray Emission (PIGE) Spectroscopy.** Briefly, each sample was cut into  $\sim 2.5 \times 2.5$  cm strips with methanol-rinsed scissors. Two gamma-ray characteristics generated at 110 keV and 197 keV due to the decay of the  $^{19}\text{F}$  nucleus under continuous proton bombarding (3.4 MeV beam) were measured with a high-purity germanium detector to quantify the total fluorine concentration of the exposed strip. A calibration curve was established using a set of paper spiked with known concentrations of total fluorine. The final total fluorine of each sample was adjusted based on the actual density of each sample (**Equation 1**):

$$\text{Total fluorine (corrected, ng/g)} = \text{Total fluorine (measured, ng/g)} * r/800 \quad (1)$$

(Total fluorine is described as PIGE-F in the manuscript.) The density was determined by cutting  $4 \times 4$  cm strips of each collected food packaging material. Multiple layers of strips of each sample were packed together and the thickness was measured using Vernier calipers. The obtained thickness of the multilayered sample was then divided by the number of layers to get the thickness of a single-layer ( $d$ ,  $m$ ). The food packaging material density ( $\rho$ ,  $kg/m^3$ ) was calculated by dividing the average weight of a  $4 \times 4$  cm strip by the strip's volume.

**Inoculum Preparation.** The inoculum used to initiate anaerobic decomposition was developed from a methane-producing consortia derived from decomposing MSW that has been grown on ground residential MSW for over 25 years.<sup>1</sup> To eliminate PFAS contamination in the inoculum, the culture was transferred to 85 mL biological growth medium containing PFAS-free Whatman #2 filter paper as the substrate in 160 mL serum bottles. After at least three transfers, the culture was used to inoculate larger vessels so to ultimately prepare  $\sim 20$  L to be used to inoculate reactors. The presence of ionic PFAS in the methanogenic inoculum were analyzed using EPA 537M (**Table S6**) by a commercial lab (SGS). A trip control was sent with the samples to monitor any contamination during sample transport. No PFAS were detected in the inoculum or trip control.

**Cellulose, Hemicellulose, and Klason lignin Analysis.** About 1 g sample was extracted with 140 mL of toluene/ethanol (2:1, v/v) and then dried.<sup>2</sup> A known weight ( $\sim 0.1$ - 0.3 g) of ground sample was subjected to a two-stage acid hydrolysis. Sugars (arabinose, galactose, glucose, mannose, and xylose) liberated from acid digestion were then analyzed by HPLC using an ICS

31 2500 pulsed electrochemical detector (Dionex, Sunnyvale, CA). Anhydro correction was used to  
32 convert glucose to cellulose and the other sugars to hemicellulose. Klason lignin was measured  
33 from the solids remaining after acid hydrolysis as the weight loss on ignition at 550 °C for 2 h.  
34 In the Klason lignin method, any organic material that is not soluble in the initial toluene/ethanol  
35 wash (which removes lipophilic extractives), and does not dissolve in sulfuric acid, will be  
36 counted as lignin.

### 37 **Residual Solid Extraction for Rinsate Gas Chromatography-Mass Spectrometer (GC-MS)**

38 **Analysis.** Residual solids at the end of the reactor test in the reactors underwent an in-vial solid-  
39 liquid extraction for 11 volatile PFAS targets (Table S3) using methodology developed by  
40 Rewerts et al.<sup>3</sup> Briefly, 10 mg ( $\pm$  4 mg) of residual solids were added to an autosampler vial  
41 with 1440  $\mu$ L of methanol (99.8%, VWR, Radnor, PA). The vial was spiked with 60  $\mu$ L of eight  
42 isotopically labeled internal standards for a final concentration of 100 pg/ $\mu$ L. Each vial was  
43 vortexed, sonicated for 10 minutes, and allowed to sit for at least 1 hour to settle solid  
44 particulates. If the concentration of the solid residual was beyond the calibration curve, the mass  
45 extracted was halved (5 mg ( $\pm$  2 mg)). If the concentration was still above the calibration curve,  
46 a 1:20 (v/v) dilution of the 5 mg extract into methanol was done in a 2 mL centrifuge tube  
47 (VWR, Randor, PA) before being added to the autosampler vial to get the concentration of PFAS  
48 targets within the range of the calibration curve. Rinsate of the reactor did not undergo a pre-  
49 concentration step before analysis due to the potential loss of volatile PFAS. Therefore, to an  
50 autosampler vial with an insert, 288  $\mu$ L of rinsate was added to 12  $\mu$ L of eight isotopically  
51 labeled internal standards for a final concentration of 100 pg/ $\mu$ L and vortexed. All analyses for  
52 volatile PFAS were done using concurrent solvent recondensation-large volume injection GC-  
53 MS.<sup>3</sup>

54  
55 **GC-MS Analysis.** For volatile PFAS analysis, 10  $\mu$ L of extract was injected in splitless mode  
56 with an inlet temperature of 280 °C. A 4 mm i.d. single taper Topaz inlet liner with 15 mg  
57 deactivated quartz wool (Restek, Bellefonte, PA) was used. Helium was used as the carrier gas in  
58 a constant flow mode of 1 mL/min. Separations were performed using a deactivated, fused silica  
59 tubing capillary column (Agilent, 5 m  $\times$  0.53 mm i.d.) connected to an Rxi-624Sil MS capillary  
60 column (Restek, 30 m  $\times$  0.25 mm i.d., 1.40  $\mu$ m film thickness). The GC oven temperature  
61 program was as follows: 50 °C for 2 min, ramped to 188 °C at a rate of 5 °C/min, then ramped to

62 300 °C at a rate of 15 °C/min for a total run time of 37.07 min. The Agilent 6890 GC was  
63 connected to an Agilent 5973N MS (Santa Clara, CA) that was operated in positive chemical  
64 ionization mode and in selected ion monitoring mode with methane as the reagent gas at a flow  
65 rate of 1 mL/min. Analyte concentrations for FTOHs, sFTOHs, FOSAs, and FOSEs were  
66 determined by a calibration curve with a minimum of 6 points with 1/x weighted linear  
67 regression or quadratic regression. All standards were prepared in the range of 1–2000 pg/μL.  
68 Continuing calibration verification standards (10 and 100 pg/μL) were analyzed after every five  
69 samples and concentrations were expected to fall within  $\pm 30\%$ . Method blanks and solvent  
70 blanks were analyzed to monitor potential carryover introduced during the experimental  
71 procedure; however, none was observed.<sup>4</sup>

72  
73 **Leachate Analytical Method.** A solid phase extraction method was used to isolate the analytes  
74 from the leachate matrix before analysis. The frozen leachate samples were thawed and  
75 centrifuged to remove solids and spiked with an IS to a concentration of 800 ng/L. In preliminary  
76 work, a pilot study confirmed that the freezing and re-thawing steps did not negatively impact  
77 the analyzed ionic PFAS compounds. The spiked leachate was then loaded onto weak ion  
78 exchange cartridges (Waters Corp., 150 mg, 30 μm), which were pre-cleaned, pre-conditioned,  
79 and equilibrated with 4 mL 0.03% NH<sub>4</sub>OH in methanol solution, 4 mL methanol, and 4 mL  
80 water before use. The samples were eluted with methanol and 0.03% NH<sub>4</sub>OH methanol solution.  
81 Both eluents were collected for each sample. To ensure consistent sample composition for all  
82 analyzed leachate samples, the extracted samples were dried in a SpeedVac without heat and at  
83 the lowest pressure setting (0.1 Torr). The dried samples were stored in a -20°C freezer before  
84 being reconstituted with 2 mL of 90:10 water: methanol (v/v). Methanol was added first to  
85 reconstitute highly hydrophobic PFAS, then water was added to reconstitute the remaining PFAS  
86 to minimize PFAS loss.<sup>5</sup>

87 The leachate samples were analyzed with an Agilent 1290 LC coupled to a 6495c Agilent QqQ  
88 MS/MS using two separate methods: the first method consisted of a large panel of PFAS that has  
89 been previously published<sup>5,6</sup> and the second method a FTCA only panel. An InfinityLab  
90 Poroshell HPH-C18 delay column (3.0 x 50 mm, 4μm; Agilent, Santa Clara, CA) was used for  
91 the large PFAS panel. Approximately 250 μL of leachate sample was injected into the instrument  
92 for analysis of 52 ionic PFAS analytes (Table S5). Sample preparation controls consisted of a

93 neat positive control (light and heavy calibration mixes spiked into distilled water [800 ng/L,  
94 PFAS panel; 3ng/mL, FTCA panel]) which was used to monitor extraction efficiency, and a  
95 negative neat control (spiked with only the heavy mix) to monitor whether contamination  
96 occurred during the SPE step. The instrument controls were a matrix matched extracted positive  
97 control [800 ng/L, PFAS panel; 3ng/mL, FTCA panel] to track instrument sensitivity over time  
98 and a negative control (IS only into matched matrix) to track potential carryover. Those controls  
99 were analyzed after the calibration curve and after every twenty unknown samples.

100  
101 For the FTCA panel method, a 50  $\mu$ L aliquot was injected onto a Kinetex F5 (2.1 x 100 mm, 100  
102  $\text{\AA}$ ; Phenomenex, Torrance, CA) analytical column at 50°C for separation. Aqueous (solvent A:  
103 water with 5% ACN and 0.1% formic acid) and organic (solvent B: ACN with 5% water and  
104 0.1% formic acid) solvents were run at 500  $\mu$ L/min using the following gradient: 0 min: 1% B,  
105 0.5 min 50% B, 4 min: 99% B, 6 min: 99% B, 6.01 min: 1% B, & 7 min: 1%. Additionally, an  
106 InfinityLab Poroshell HPH-C18 delay column (3.0 x 50 mm, 4 $\mu$ m; Agilent, Santa Clara, CA)  
107 was installed in the flow path of the LC to delay any potential PFAS contamination in the HPLC  
108 solvent from interfering with the sample analysis.

109 The method detection limits were 2500 ng/L for 5:3 FTAC and 6:2 FTCA, and 1-2 ng/L for the  
110 other ionic PFAS analytes. A higher calibration range was needed for the FTCA panel due to the  
111 high background noise from the PFAS free matrix.

112

## 113 **Results and Discussion**

### 114 **PFAS Release to Leachate.**

115  
116 Cumulative PFAS release to leachate is presented in **Figures S12 - S16**, and in **Table S11**.

117

### 118 **Release of PFAS to Leachate from the High F Materials**

119 High concentrations of 5:3 FTCA and 6:2 FTCA were detected in the leachate from most of the  
120 high F materials (**Figure S16B**). The high F materials also had the highest volatile PFAS yields  
121 (343-799 ng/g, dominated by 6:2 FTOH) (**Table 2**). Both 5:3 FTCA and 6:2 FTCA have been



122 reported as the principal biotransformation products of 6:2 FTOH in landfill leachate,<sup>7</sup> biosolids,<sup>8</sup>  
123 and river sediments.<sup>9</sup> While 6:2 FTOH was detected in the gas phase around day 10, FTCAs  
124 were detected in the leachate as early as day 33 (Compostable bowls) and as late as day 254  
125 (Bagasse containers). The ratio of both 5:3 FTCA plus 6:2 FTCA released in leachate to the  
126 summed 6:2 FTOH released into the gas phase ranged from 42% to 198% in the Natural plates a-  
127 c, Compostable bowls, Biodegradable boxes, and Bagasse containers reactors (**Table S11**). This  
128 is consistent with the observation that 6:2 FTOH is released early and that some is converted to  
129 FTCAs. Of course, the FTOH released to the gas phase represents removal from a reactor and  
130 presumably, some FTOH was converted to FTCAs prior to its release in the reactor gas. The  
131 discontinuous presence of FTCAs in the Natural plates (**Figure S13**) could be due to the high  
132 LOQ of 5:3 FTCA (2500 ng/L) and 6:2 FTCA (2500 ng/L).

133 Both 5:3 FTCA and 6:2 FTCA were released from all high F reactors, except for the Popcorn  
134 bags and Eco-friendly plates. In the case of Popcorn bag 1, it is possible that monitoring was  
135 terminated prior to FTCA generation. Another possibility is that it was not detected due to the  
136 high LOQ. Surprisingly, FTCA was not detected in Popcorn bag 2 or Eco-friendly plates despite  
137 the extended monitoring time and high FTOH release. Perfluorohexanoic acid (PFHxA) was the  
138 dominant compound measured in the leachate from both Popcorn reactors as well as from the  
139 Eco-friendly plates. PFHxA has been reported as the primary impurity, degradant, and  
140 metabolite of the side-chain fluorinated polymers and fluorosurfactants due to the shift to short-  
141 chain fluorotelomer-based products.<sup>10-13</sup>

142

143 **Release of PFAS to Leachate from the Low F and MSW Materials**

144 Leachate PFAS release from the low F materials is summarized in **Figure S16** and **Table S11**.  
145 PFAS release is generally 2 orders of magnitude lower than that from the high F materials, which  
146 is consistent with the trend observed for volatile PFAS release. In contrast to the high F reactors,  
147 neither 6:2 FTCA or 5:3 FTCA were detected (**Table S11**). Instead, relatively low  
148 concentrations of PFBA, PFPeA, 6:2 FTS, and GenX were released to the leachate. Similarly, in  
149 the leachate from the three MSW reactors that exhibited typical anaerobic decomposition (MSW-  
150 May a, MSW-August a, and MSW-August b), small amounts of PFBA, PFPeA, PFHxA, 6:2  
151 FTS, and GenX were released (**Table S11**). No FTCAs were detected in the MSW leachate  
152 although they are the dominant PFAS in landfill leachate (e.g., 5:3 FTCA, 7:3 FTCA).<sup>14, 15</sup>  
153 However, similar to landfill leachate, other short-chain PFAS that are significant in landfill  
154 leachate were detected (e.g., PFBA, PFBS, PFPeA, PFHxA).<sup>15</sup>

155

156

## 157 **References**

158

159 (1) Wang, Y.-S.; Byrd, C. S.; Barlaz, M. A. Anaerobic biodegradability of cellulose and  
160 hemicellulose in excavated refuse samples using a biochemical methane potential assay. *J. Ind.*  
161 *Microbiol. Biotech.* **1994**, *13* (3), 147-153.

162 (2) De la Cruz, F. B.; Yelle, D. J.; Gracz, H. S.; Barlaz, M. A. Chemical changes during  
163 anaerobic decomposition of hardwood, softwood, and old newsprint under mesophilic and  
164 thermophilic conditions. *J. Agric. Food Chem.* **2014**, *62* (27), 6362-6374.

165 (3) Rewerts, J. N.; Morr , J. T.; Massey Simonich, S. L.; Field, J. A. In-vial extraction large  
166 volume gas chromatography mass spectrometry for analysis of volatile PFASs on papers and  
167 textiles. *Environ. Sci. Technol.* **2018**, *52* (18), 10609-10616.

168 (4) Cahuas, L.; Titaley, I. A.; Field, J. A. Mass-labeled fluorotelomer alcohol fragmentation  
169 gives “false positive” for nonlabeled fluorotelomer alcohols with implications for consumer  
170 product analysis. *J. Am. Soc. Mass Spectrom.* **2022**, *33* (2), 399-403.

171 (5) Weed, R. A.; Boatman, A. K.; Enders, J. R. Recovery of per-and polyfluoroalkyl substances  
172 after solvent evaporation. *Environ. Sci.: Process. Impacts* **2022**, *24* (12), 2263-2271.

173 (6) Enders, J. R.; Weed, R. A.; Griffith, E. H.; Muddiman, D. C. Development and validation of  
174 a high resolving power absolute quantitative per-and polyfluoroalkyl substances method  
175 incorporating skyline data processing. *Rapid Commun. Mass Spectrom.* **2022**, *36* (11), e9295.

- 176 (7) Allred, B. M.; Lang, J. R.; Barlaz, M. A.; Field, J. A. Physical and biological release of poly-  
177 and perfluoroalkyl substances (PFASs) from municipal solid waste in anaerobic model landfill  
178 reactors. *Environ. Sci. Technol.* **2015**, *49* (13), 7648-7656.
- 179 (8) Zhang, S.; Szostek, B.; McCausland, P. K.; Wolstenholme, B. W.; Lu, X.; Wang, N.; Buck,  
180 R. C. 6: 2 and 8: 2 fluorotelomer alcohol anaerobic biotransformation in digester sludge from a  
181 WWTP under methanogenic conditions. *Environ. Sci. Technol.* **2013**, *47* (9), 4227-4235.
- 182 (9) Zhao, L.; Folsom, P. W.; Wolstenholme, B. W.; Sun, H.; Wang, N.; Buck, R. C. 6: 2  
183 Fluorotelomer alcohol biotransformation in an aerobic river sediment system. *Chemosphere*  
184 **2013**, *90* (2), 203-209.
- 185 (10) Luz, A. L.; Anderson, J. K.; Goodrum, P.; Durda, J. Perfluorohexanoic acid toxicity, part I:  
186 development of a chronic human health toxicity value for use in risk assessment. *Regul. Toxicol.*  
187 *Pharmacol.* **2019**, *103*, 41-55.
- 188 (11) Wang, Z.; Cousins, I. T.; Scheringer, M.; Hungerbühler, K. Fluorinated alternatives to long-  
189 chain perfluoroalkyl carboxylic acids (PFCAs), perfluoroalkane sulfonic acids (PFASs) and their  
190 potential precursors. *Environ. Int.* **2013**, *60*, 242-248.
- 191 (12) Scheringer, M.; Trier, X.; Cousins, I. T.; de Voogt, P.; Fletcher, T.; Wang, Z.; Webster, T.  
192 F. Helsingør statement on poly-and perfluorinated alkyl substances (PFASs). *Chemosphere*  
193 **2014**, *114*, 337-339.
- 194 (13) Wang, Z.; Cousins, I. T.; Scheringer, M.; Hungerbuehler, K. Hazard assessment of  
195 fluorinated alternatives to long-chain perfluoroalkyl acids (PFAAs) and their precursors: status  
196 quo, ongoing challenges and possible solutions. *Environ. Int.* **2015**, *75*, 172-179.
- 197 (14) Lang, J. R.; Allred, B. M.; Field, J. A.; Levis, J. W.; Barlaz, M. A. National estimate of per-  
198 and polyfluoroalkyl substance (PFAS) release to US municipal landfill leachate. *Environ. Sci.*  
199 *Technol.* **2017**, *51* (4), 2197-2205.
- 200 (15) Capozzi, S. L.; Leang, A. L.; Rodenburg, L. A.; Chandramouli, B.; Delistraty, D. A.; Carter,  
201 C. H. PFAS in municipal landfill leachate: occurrence, transformation, and sources.  
202 *Chemosphere* **2023**, *334*, 138924.

204 **Table S1.** Fluorine content of food packaging materials as screened by PIGE and GC-MS for  
 205 total fluorine and 6:2 FTOH, respectively.

| Material                                                                                          | Paper Density (kg/m <sup>3</sup> ) | Total fluorine conc. (PIGE-F) | Total fluorine conc. (PIGE F)-corrected based on density of paper <sup>e</sup> | Volatile PFAS (GC-MS) <sup>a</sup> | High or Low F Designation <sup>c</sup> |
|---------------------------------------------------------------------------------------------------|------------------------------------|-------------------------------|--------------------------------------------------------------------------------|------------------------------------|----------------------------------------|
|                                                                                                   |                                    | (ng/g)                        | (ng/g)                                                                         | 6:2 FTOH <sup>b</sup> (ng/g)       |                                        |
| hamburger wrappers 1                                                                              | 750                                | 6000                          | 6400                                                                           | NA                                 | L                                      |
| hamburger wrappers 2                                                                              | 1100                               | 5000                          | 2660                                                                           | NA                                 | L                                      |
| hamburger wrappers 3                                                                              | 1000                               | 2000                          | 1600                                                                           | NA                                 | L                                      |
| hamburger wrappers 4                                                                              | 1010                               | 8000                          | 6360                                                                           | NA                                 | L                                      |
| restaurant burger fair bag                                                                        | 1100                               | 11000                         | 8010                                                                           | NA                                 | L                                      |
| paper plates-1                                                                                    | 790                                | <LOD                          | <LOD                                                                           | NA                                 | L                                      |
| hot dog boxes                                                                                     | 1310                               | 3000                          | 1830                                                                           | NA                                 | L                                      |
| paper plates- 2                                                                                   | 660                                | 1000                          | 1220                                                                           | NA                                 | L                                      |
| <i>microwavable popcorn bags a-2021</i>                                                           | <i>1090</i>                        | <i>774000</i>                 | <i>571000</i>                                                                  | <i>1150</i>                        | <i>H</i>                               |
| <i>microwavable popcorn bags b-2021</i>                                                           | <i>1270</i>                        | <i>&lt;LOD</i>                | <i>&lt;LOD</i>                                                                 | <i>NA</i>                          | <i>L</i>                               |
| <i>microwavable popcorn bags c-2021</i>                                                           | <i>1110</i>                        | <i>535000</i>                 | <i>386000</i>                                                                  | <i>4730</i>                        | <i>H</i>                               |
| <i>microwavable popcorn bags d-2021</i>                                                           | <i>1060</i>                        | <i>1040000</i>                | <i>1030000</i>                                                                 | <i>1880</i>                        | <i>H</i>                               |
| <i>microwavable popcorn bags e-2021<sup>d</sup></i>                                               | <i>1140</i>                        | <i>999000</i>                 | <i>703000</i>                                                                  | <i>89.2</i>                        | <i>H</i>                               |
| <i>microwavable popcorn bags f-2021</i>                                                           | <i>1060</i>                        | <i>1160000</i>                | <i>869000</i>                                                                  | <i>NA</i>                          | <i>H</i>                               |
| <i>microwavable popcorn bags g-2021</i>                                                           | <i>1090</i>                        | <i>900000</i>                 | <i>661000</i>                                                                  | <i>1490</i>                        | <i>H</i>                               |
| microwavable popcorn bags a-2022                                                                  | NA                                 | NA                            | NA                                                                             | NA                                 | L                                      |
| <i>microwavable popcorn bags c-2022</i>                                                           | <i>NA</i>                          | <i>NA</i>                     | <i>NA</i>                                                                      | <i>8310</i>                        | <i>H</i>                               |
| microwavable popcorn bags d-2022                                                                  | NA                                 | NA                            | NA                                                                             | NA                                 | L                                      |
| microwavable popcorn bags e-2022                                                                  | NA                                 | NA                            | NA                                                                             | NA                                 | L                                      |
| <i>microwavable popcorn bags f-2022</i>                                                           | <i>NA</i>                          | <i>NA</i>                     | <i>NA</i>                                                                      | <i>2470</i>                        | <i>H</i>                               |
| microwavable popcorn bags g-2022                                                                  | NA                                 | NA                            | NA                                                                             | NA                                 | L                                      |
| compostable bowls                                                                                 | <i>650</i>                         | <i>1592000</i>                | <i>1970000</i>                                                                 | <i>3730</i>                        | <i>H</i>                               |
| microwave kraft containers                                                                        | 610                                | <LOD                          | <LOD                                                                           | NA                                 | L                                      |
| concrete eco-friendly food cones                                                                  | 820                                | 7000                          | 6860                                                                           | NA                                 | L                                      |
| unbleached parchment paper                                                                        | 850                                | 25000                         | 23600                                                                          | NA                                 | L                                      |
| take-out boxes-1                                                                                  | 760                                | 43000                         | 45400                                                                          | NA                                 | L                                      |
| microwave takeout boxes                                                                           | 840                                | 24000                         | 22800                                                                          | NA                                 | L                                      |
| eco-friendly food holder trays (sugar fiber is made with 100% non-toxic plant byproduct material) | 770                                | 62000                         | 64800                                                                          | NA                                 | L                                      |
| stand up ziploc bags                                                                              | 850                                | 46000                         | 43200                                                                          | NA                                 | L                                      |
| disposable lunch bags                                                                             | 750                                | 51000                         | 54500                                                                          | NA                                 | L                                      |
| biodegradable boxes                                                                               | <i>730</i>                         | <i>1590000</i>                | <i>1750000</i>                                                                 | <i>3560</i>                        | <i>H</i>                               |
| grease-proof sturdy food trays                                                                    | 860                                | 89000                         | 82900                                                                          | NA                                 | L                                      |
| eupako paper bags                                                                                 | 800                                | 107000                        | 107000                                                                         | NA                                 | L                                      |
| take-out boxes- 2                                                                                 | 790                                | 16000                         | 16200                                                                          | NA                                 | L                                      |
| bagasse containers (sugar cane residue)                                                           | 500                                | 1640000                       | 2620000                                                                        | 3420                               | H                                      |
| greaseproof paper french fry cups                                                                 | 1020                               | 1000                          | 780                                                                            | NA                                 | L                                      |
| kraft compostable paper food cups                                                                 | 77                                 | 35000                         | 361000                                                                         | NA                                 | L                                      |
| food paper                                                                                        | 2830                               | 264000                        | 74800                                                                          | NA                                 | L                                      |
| disposable grease resistant kraft bags                                                            | 250                                | 12000                         | 38400                                                                          | NA                                 | L                                      |

|                                                                                        |      |                |                |      |          |
|----------------------------------------------------------------------------------------|------|----------------|----------------|------|----------|
| essentials patty paper                                                                 | 7940 | <LOD           | <LOD           | NA   | L        |
| natural plates                                                                         | 640  | <i>1160000</i> | <i>1440000</i> | 3780 | <i>H</i> |
| eco-friendly plates (sugar fiber is made with 100% non-toxic plant byproduct material) | 650  | <i>1480000</i> | <i>1810000</i> | 6410 | <i>H</i> |
| disposable french fry cups                                                             | 820  | 9000           | 8760           | NA   | L        |
| meat hugger natural freezer paper                                                      | 702  | 2000           | 2280           | NA   | L        |
| bamboo fiber cups                                                                      | 820  | 45000          | 43800          | NA   | L        |
| grease resistant sandwich liners                                                       | 780  | 300000         | 309000         | NA   | L        |

206 <sup>a</sup>Food packaging materials with ‘L’ designations were not analyzed using GC-MS.

207 <sup>b</sup>In the case of the 2022 popcorn bag samples, PIGE analyses were not available and the  
208 classification as High or Low F was based on the methanol extraction data alone.

209 <sup>c</sup>Food packaging materials with ‘H’ designations are *italicized*.

210 <sup>d</sup>popcorn bag e-2021 was classified as High F despite the relatively low 6:2 FTOH based on the  
211 high F as measured by PIGE ( $9.99 \times 10^8$  ng/g) and the possibility that popcorn bag e-2021  
212 contained other volatile PFAS.

213 <sup>e</sup>The total F measured using PIGE does not account for the density differences between the  
214 samples and the standard. Therefore, the total F values used to help identify the high (H) and low  
215 (L) designations have been corrected to account for density differences (see eqn. 1).

216 <LOD = less than limit of detection.

217 NA = not analyzed.

218

219 **Table S2.** Organic content and biochemical methane potential of materials tested in landfill  
 220 simulation reactors.

| <b>Reactor groups</b> | <b>Substrates in reactor</b>                                               | <b>BMP (mL CH<sub>4</sub>/g paper)</b> | <b>Cellulose (%)</b> | <b>Hemicellulose (%)</b> | <b>Lignin (%)</b> |
|-----------------------|----------------------------------------------------------------------------|----------------------------------------|----------------------|--------------------------|-------------------|
| <b>High F</b>         | Popcorn Bags 1 - 6 brands microwavable popcorn bags collected in 2021      | 327                                    | 65                   | 21                       | 10.93             |
|                       | Popcorn Bags 2 - 2 brands microwavable popcorn bags collected in 2022      | 328                                    | 73                   | 11                       | 2.69              |
|                       | compostable bowls                                                          | 319                                    | 62                   | 26                       | 11.33             |
|                       | biodegradable boxes                                                        | 362                                    | 62                   | 25                       | 10.97             |
|                       | bagasse containers                                                         | 294                                    | 71                   | 20                       | 8.9               |
|                       | natural plates                                                             | 313                                    | 68                   | 22                       | 9.98              |
|                       | eco-friendly plates                                                        | 342                                    | 66                   | 22                       | 10.74             |
| <b>Low F</b>          | mixed paper plates, eco-friendly food trays, and poly coated freezer paper | 200                                    | 58                   | 14                       | 27                |
| <b>Control</b>        | Whatman #2 filter paper                                                    | 299                                    | 97                   | 1                        | 0.92              |
| <b>MSW-May</b>        | Fresh residential solid waste from Raleigh in May 2022                     | 173                                    | 31                   | 7                        | 23.12             |
| <b>MSW-August</b>     | Fresh residential solid waste from Raleigh in August 2022                  | 129                                    | 34                   | 6                        | 15.98             |

**Table S3.** List of target volatile PFAS analytes for food packaging materials after methanol extraction and for gas sample analysis by TD-GC-MS.<sup>a</sup>

| CAS no.    | Analyte                                             | Abbreviation | Formula                                                          | Vendor     | Molecular weight (a.m.u.) | Quantifier ion (m/z) | Qualifier ion (m/z) | Surrogate standard                         | Liquid Extract Analysis <sup>b</sup> | Gas Phase Analysis <sup>c</sup> |
|------------|-----------------------------------------------------|--------------|------------------------------------------------------------------|------------|---------------------------|----------------------|---------------------|--------------------------------------------|--------------------------------------|---------------------------------|
| 2043-47-2  | 4:2 fluorotelomer alcohol                           | 4:2 FTOH     | C <sub>6</sub> H <sub>5</sub> F <sub>9</sub> O                   | Wellington | 264                       | 265                  | 227                 | MF BET                                     | ×                                    | ×                               |
| 647-42-7   | 6:2 fluorotelomer alcohol                           | 6:2 FTOH     | C <sub>8</sub> H <sub>5</sub> F <sub>13</sub> O                  | Wellington | 364                       | 365                  | 327                 | MF HET                                     | ×                                    | ×                               |
| 678-39-7   | 8:2 fluorotelomer alcohol                           | 8:2 FTOH     | C <sub>10</sub> H <sub>5</sub> F <sub>17</sub> O                 | Wellington | 464                       | 465                  | 427                 | M2FOET                                     | ×                                    | ×                               |
| 865-86-1   | 10:2 fluorotelomer alcohol                          | 10:2 FTOH    | C <sub>12</sub> H <sub>5</sub> F <sub>21</sub> O                 | Wellington | 564                       | 565                  | 527                 | MF DET                                     | ×                                    | ×                               |
| 39239-77-5 | 12:2 fluorotelomer alcohol                          | 12:2 FTOH    | C <sub>14</sub> H <sub>5</sub> F <sub>25</sub> O                 | SynQuest   | 664                       | 665                  | 627                 | MF DET                                     | ×                                    | ×                               |
| 31506-32-8 | <i>N</i> -methyl perfluorooctane sulfonamide        | MeFOSA       | C <sub>9</sub> H <sub>4</sub> NO <sub>2</sub> SF <sub>17</sub>   | Wellington | 513                       | 514                  | -                   | <i>d</i> <sub>3</sub> - <i>N</i> -MeFOSA-M | ×                                    | ×                               |
| 4151-50-2  | <i>N</i> -ethyl perfluorooctane sulfonamide         | EtFOSA       | C <sub>10</sub> H <sub>6</sub> NO <sub>2</sub> SF <sub>17</sub>  | Wellington | 527                       | 528                  | -                   | <i>d</i> <sub>5</sub> - <i>N</i> -EtFOSA-M | ×                                    | ×                               |
| 24448-09-7 | <i>N</i> -methyl perfluorooctane sulfonamidoethanol | MeFOSE       | C <sub>11</sub> H <sub>8</sub> NO <sub>3</sub> SF <sub>17</sub>  | Wellington | 557                       | 540                  | 558                 | <i>d</i> <sub>7</sub> - <i>N</i> -MeFOSE-M | ×                                    | ×                               |
| 1691-99-2  | <i>N</i> -ethyl perfluorooctane sulfonamidoethanol  | EtFOSE       | C <sub>12</sub> H <sub>10</sub> NO <sub>3</sub> SF <sub>17</sub> | Wellington | 571                       | 554                  | 572                 | <i>d</i> <sub>9</sub> - <i>N</i> -EtFOSE-M | ×                                    | ×                               |
| 17527-29-6 | 6:2 fluorotelomer acrylate                          | 6:2 FTAc     | C <sub>11</sub> H <sub>7</sub> F <sub>13</sub> O <sub>2</sub>    | SynQuest   | 418                       | 419                  | -                   | <i>d</i> <sub>5</sub> -6:2 FTMAc           |                                      | ×                               |
| 27905-45-9 | 8:2 fluorotelomer acrylate                          | 8:2 FTAc     | C <sub>13</sub> H <sub>7</sub> F <sub>17</sub> O <sub>2</sub>    | Wellington | 518                       | 519                  | -                   | <i>d</i> <sub>5</sub> -6:2 FTMAc           |                                      | ×                               |
| 17741-60-5 | 10:2 fluorotelomer acrylate                         | 10:2 FTAc    | C <sub>15</sub> H <sub>7</sub> F <sub>21</sub> O <sub>2</sub>    | Wellington | 618                       | 619                  | -                   | <i>d</i> <sub>5</sub> -6:2 FTMAc           |                                      | ×                               |
| 2144-53-8  | 6:2 fluorotelomer methylacrylate                    | 6:2 FTMAc    | C <sub>12</sub> H <sub>9</sub> F <sub>13</sub> O <sub>2</sub>    | SynQuest   | 432                       | 433                  | 461                 | <i>d</i> <sub>5</sub> -6:2 FTMAc           |                                      | ×                               |
| 1996-88-9  | 8:2 fluorotelomer methylacrylate                    | 8:2 FTMAc    | C <sub>14</sub> H <sub>9</sub> F <sub>17</sub> O <sub>2</sub>    | SynQuest   | 532                       | 533                  | 561                 | <i>d</i> <sub>5</sub> -6:2 FTMAc           |                                      | ×                               |
| 25291-17-2 | 6:2 fluorotelomer olefin                            | 6:2 FTO      | C <sub>8</sub> H <sub>3</sub> F <sub>13</sub>                    | SynQuest   | 346                       | 327                  | -                   | <i>d</i> <sub>5</sub> -6:2 FTMAc           |                                      | ×                               |
| 21652-58-4 | 8:2 fluorotelomer olefin                            | 8:2 FTO      | C <sub>10</sub> H <sub>3</sub> F <sub>17</sub>                   | Matrix     | 446                       | 427                  | -                   | <i>d</i> <sub>5</sub> -6:2 FTMAc           |                                      | ×                               |
| 30389-25-4 | 10:2 fluorotelomer olefin                           | 10:2 FTO     | C <sub>12</sub> H <sub>3</sub> F <sub>21</sub>                   | Matrix     | 546                       | 527                  | -                   | <i>d</i> <sub>5</sub> -6:2 FTMAc           |                                      | ×                               |
| 67103-05-3 | 12:2 fluorotelomer olefin                           | 12:2 FTO     | C <sub>14</sub> H <sub>3</sub> F <sub>25</sub>                   | SynQuest   | 646                       | 627                  | -                   | <i>d</i> <sub>5</sub> -6:2 FTMAc           |                                      | ×                               |
| 355-43-1   | Perfluorohexyl iodide                               | PFHxI        | C <sub>6</sub> F <sub>13</sub> I                                 | SynQuest   | 446                       | 319                  | 427                 | 7Me-6:2 FTI                                |                                      | ×                               |
| 507-63-1   | Perfluorooctyl iodide                               | PFOI         | C <sub>8</sub> F <sub>17</sub> I                                 | SynQuest   | 546                       | 419                  | 527                 | 7Me-6:2 FTI                                |                                      | ×                               |
| 423-62-1   | Perfluorodecyl iodide                               | PFDI         | C <sub>10</sub> F <sub>21</sub> I                                | SynQuest   | 646                       | 519                  | 627                 | 7Me-6:2 FTI                                |                                      | ×                               |
| 2043-55-2  | 4:2 fluorotelomer iodide                            | 4:2 FTI      | C <sub>6</sub> H <sub>4</sub> F <sub>9</sub> I                   | SynQuest   | 374                       | 355                  | 403                 | 7Me-6:2 FTI                                |                                      | ×                               |
| 2043-57-4  | 6:2 fluorotelomer iodide                            | 6:2 FTI      | C <sub>8</sub> H <sub>4</sub> F <sub>13</sub> I                  | SynQuest   | 474                       | 455                  | 503                 | 7Me-6:2 FTI                                |                                      | ×                               |
| 2043-53-0  | 8:2 fluorotelomer iodide                            | 8:2 FTI      | C <sub>10</sub> H <sub>4</sub> F <sub>17</sub> I                 | SynQuest   | 574                       | 555                  | 603                 | 7Me-6:2 FTI                                |                                      | ×                               |
| 2043-54-1  | 10:2 fluorotelomer iodide                           | 10:2 FTI     | C <sub>12</sub> H <sub>4</sub> F <sub>21</sub> I                 | SynQuest   | 674                       | 655                  | 703                 | 7Me-6:2 FTI                                |                                      | ×                               |

|             |                                      |           |                                                 |            |     |     |     |       |   |  |
|-------------|--------------------------------------|-----------|-------------------------------------------------|------------|-----|-----|-----|-------|---|--|
| 24015-83-6  | 7:2 secondary fluorotelomer alcohol† | 7:2-sFTOH | C <sub>9</sub> H <sub>5</sub> F <sub>15</sub> O | Wellington | 414 | 377 | 415 | MFHET | × |  |
| 914637-05-1 | 5:2 secondary fluorotelomer alcohol† | 5:2-sFTOH | C <sub>7</sub> H <sub>5</sub> F <sub>11</sub> O | Wellington | 314 | 277 | 315 | MFHET | × |  |

<sup>a</sup>The 5:2-sFTOH and 7:2-sFTOH were targets in the liquid extracts because target standards were acquired after gas phase analyses were complete. However, they were suspects for gas phase analyses.

<sup>b,c</sup> All PFAS have “×” in the same row is included in this method.

Wellington: Wellington Laboratories (Guelph, ON), SynQuest: SynQuest Laboratories (Alachua, FL), Matrix: Matrix Scientific (Columbia, SC), a.m.u.: atomic mass unit.



**Table S4.** List of 17 suspect volatile PFAS analytes for gas sample analysis.

| CAS no.     | Analyte                                              | Abbreviation | Formula                                                          | Molecular weight (a.m.u.) | Quantifier ion ( <i>m/z</i> ) | Qualifier ion ( <i>m/z</i> ) | Target PFAS calibration curve used for semi quantification |
|-------------|------------------------------------------------------|--------------|------------------------------------------------------------------|---------------------------|-------------------------------|------------------------------|------------------------------------------------------------|
| 60699-51-6  | 14:2 fluorotelomer alcohol                           | 14:2 FTOH    | C <sub>16</sub> H <sub>5</sub> F <sub>29</sub> O                 | 764                       | 765                           | 727                          | 10:2 FTOH                                                  |
| 68298-12-4  | <i>N</i> -methyl perfluorobutane sulfonamidoethanol  | MeFBSA       | C <sub>5</sub> H <sub>4</sub> NO <sub>2</sub> SF <sub>9</sub>    | 313                       | 314                           | -                            | MeFOSA                                                     |
| 68259-15-4  | <i>N</i> -methyl perfluorohexane sulfonamidoethanol  | MeFHxSA      | C <sub>7</sub> H <sub>4</sub> NO <sub>2</sub> SF <sub>13</sub>   | 413                       | 414                           | -                            | MeFOSA                                                     |
| Not found   | <i>N</i> -methyl perfluoropropane sulfonamidoethanol | MeFPrSE      | C <sub>6</sub> H <sub>8</sub> NO <sub>3</sub> SF <sub>7</sub>    | 307                       | 290                           | 308                          | MeFOSE                                                     |
| 34454-97-2  | <i>N</i> -methyl perfluorobutane sulfonamidoethanol  | MeFBSE       | C <sub>7</sub> H <sub>8</sub> NO <sub>3</sub> SF <sub>9</sub>    | 357                       | 340                           | 358                          | MeFOSE                                                     |
| 68555-74-8  | <i>N</i> -methyl perfluoropentane sulfonamidoethanol | MeFPeSE      | C <sub>8</sub> H <sub>8</sub> NO <sub>3</sub> SF <sub>11</sub>   | 407                       | 390                           | 408                          | MeFOSE                                                     |
| 68555-75-9  | <i>N</i> -methyl perfluorohexane sulfonamidoethanol  | MeFHxSE      | C <sub>9</sub> H <sub>8</sub> NO <sub>3</sub> SF <sub>13</sub>   | 457                       | 440                           | 458                          | MeFOSE                                                     |
| 68555-76-0  | <i>N</i> -methyl perfluoroheptane sulfonamidoethanol | MeFHpSE      | C <sub>10</sub> H <sub>8</sub> NO <sub>3</sub> SF <sub>17</sub>  | 507                       | 490                           | 508                          | MeFOSE                                                     |
| Not found   | <i>N</i> -ethyl perfluoroethane sulfonamidoethanol   | EtFEtSE      | C <sub>12</sub> H <sub>10</sub> NO <sub>3</sub> SF <sub>17</sub> | 271                       | 254                           | 272                          | EtFOSE                                                     |
| Not found   | <i>N</i> -ethyl perfluoropropane sulfonamidoethanol  | EtFPrSE      | C <sub>12</sub> H <sub>10</sub> NO <sub>3</sub> SF <sub>17</sub> | 321                       | 304                           | 322                          | EtFOSE                                                     |
| 34454-97-2  | <i>N</i> -ethyl perfluorobutane sulfonamidoethanol   | EtFBSE       | C <sub>12</sub> H <sub>10</sub> NO <sub>3</sub> SF <sub>17</sub> | 371                       | 354                           | 372                          | EtFOSE                                                     |
| 68555-74-8  | <i>N</i> -ethyl perfluoropentane sulfonamidoethanol  | EtFPeSE      | C <sub>12</sub> H <sub>10</sub> NO <sub>3</sub> SF <sub>17</sub> | 421                       | 404                           | 422                          | EtFOSE                                                     |
| 68555-75-9  | <i>N</i> -ethyl perfluorohexane sulfonamidoethanol   | EtFHxSE      | C <sub>12</sub> H <sub>10</sub> NO <sub>3</sub> SF <sub>17</sub> | 471                       | 454                           | 472                          | EtFOSE                                                     |
| 68555-76-0  | <i>N</i> -ethyl perfluoroheptane sulfonamidoethanol  | EtFHpSE      | C <sub>12</sub> H <sub>10</sub> NO <sub>3</sub> SF <sub>17</sub> | 521                       | 504                           | 522                          | EtFOSE                                                     |
| 24015-83-6  | 7:2 secondary fluorotelomer alcohol                  | 7:2-sFTOH    | C <sub>9</sub> H <sub>5</sub> F <sub>15</sub> O                  | 414                       | 415                           | 395                          | 8:2 FTOH                                                   |
| 914637-05-1 | 5:2 secondary fluorotelomer alcohol                  | 5:2-sFTOH    | C <sub>7</sub> H <sub>5</sub> F <sub>11</sub> O                  | 314                       | 315                           | 295                          | 6:2 FTOH                                                   |
| 375-14-4    | 3:2 secondary fluorotelomer alcohol                  | 3:2-sFTOH    | C <sub>5</sub> H <sub>5</sub> F <sub>7</sub> O                   | 214                       | 215                           | 195                          | 4:2 FTOH                                                   |

**Table S5.** List of 52 target ionic PFAS analytes in leachate using liquid chromatography tandem-mass spectrometry (LC-MS/MS).<sup>a,b</sup>

| CAS #                                                  | Analyte                                     | Abbreviation | Neutral Molecular Formula                                          | Matching IS <sup>c</sup> | <sup>d</sup> LOQ (ng/L) | % Recovery ± SD <sup>e</sup> |
|--------------------------------------------------------|---------------------------------------------|--------------|--------------------------------------------------------------------|--------------------------|-------------------------|------------------------------|
| <b>Per and Polyfluoroalkyl carboxylic acid (PFCA)</b>  |                                             |              |                                                                    |                          |                         |                              |
| 375-22-4                                               | Perfluorobutanoic acid                      | PFBA         | C <sub>4</sub> HF <sub>7</sub> O <sub>2</sub>                      | ×                        | 10                      | 96 ± 9                       |
| 2706-90-3                                              | Perfluoropentanoic acid                     | PFPeA        | C <sub>5</sub> HF <sub>9</sub> O <sub>2</sub>                      | ×                        | 5                       | 103 ± 12                     |
| 307-24-4                                               | Perfluorohexanoic acid                      | PFHxA        | C <sub>6</sub> HF <sub>11</sub> O <sub>2</sub>                     | ×                        | 2                       | 88 ± 10                      |
| 375-85-9                                               | Perfluoroheptanoic acid                     | PFHpA        | C <sub>7</sub> HF <sub>13</sub> O <sub>2</sub>                     | ×                        | 5                       | 86 ± 11                      |
| 335-67-1                                               | Perfluorooctanoic acid                      | PFOA         | C <sub>8</sub> HF <sub>15</sub> O <sub>2</sub>                     | ×                        |                         | 64 ± 11                      |
| 375-95-1                                               | Perfluorononanoic acid                      | PFNA         | C <sub>9</sub> HF <sub>17</sub> O <sub>2</sub>                     | ×                        | 100                     | 88 ± 11                      |
| 335-76-2                                               | Perfluorodecanoic acid                      | PFDA         | C <sub>10</sub> HF <sub>19</sub> O <sub>2</sub>                    | ×                        | 100                     | 86 ± 10                      |
| 2058-94-8                                              | Perfluoroundecanoic acid                    | PFUnDA       | CF <sub>3</sub> (CF <sub>2</sub> ) <sub>9</sub> CO <sub>2</sub> H  | ×                        |                         |                              |
| 307-55-1                                               | Perfluorododecanoic acid                    | PFDoDA       | C <sub>12</sub> HF <sub>23</sub> O <sub>2</sub>                    | ×                        | 100                     | 91 ± 7                       |
| 72629-94-8                                             | Perfluorotridecanoic acid                   | PFTTrDA      | C <sub>13</sub> HF <sub>25</sub> O <sub>2</sub>                    |                          |                         |                              |
| 376-06-7                                               | Perfluorotetradecanoic acid                 | PFTeDA       | CF <sub>3</sub> (CF <sub>2</sub> ) <sub>12</sub> CO <sub>2</sub> H | ×                        | 100                     | 94 ± 12                      |
| 67905-19-5                                             | Perfluorohexadecanoic acid                  | PFHxDA       | C <sub>16</sub> HF <sub>31</sub> O <sub>2</sub>                    | ×                        |                         |                              |
| 16517-11-6                                             | Perfluorooctadecanoic acid                  | PFODA        | C <sub>18</sub> HF <sub>35</sub> O <sub>2</sub>                    |                          |                         |                              |
| <b>Per and Polyfluoroalkyl sulfonic acids (PFSA)</b>   |                                             |              |                                                                    |                          |                         |                              |
| 375-73-5                                               | Perfluorobutanesulfonic acid                | PFBS         | C <sub>4</sub> HF <sub>9</sub> O <sub>3</sub> S                    | ×                        | 10                      | 95 ± 16                      |
| 2706-91-4                                              | Perfluoropentanesulfonic acid               | PFPeS        | C <sub>5</sub> HF <sub>11</sub> O <sub>3</sub> S                   |                          |                         |                              |
| 355-46-4                                               | Perfluorohexanesulfonic acid                | PFHxS        | C <sub>6</sub> HF <sub>13</sub> O <sub>3</sub> S                   | ×                        | 10                      | 87 ± 8                       |
| 375-92-8                                               | Perfluoroheptanesulfonic acid               | PFHpS        | C <sub>7</sub> HF <sub>15</sub> O <sub>3</sub> S                   |                          |                         |                              |
| 1763-23-1                                              | Perfluorooctanesulfonic acid                | PFOS         | C <sub>8</sub> HF <sub>17</sub> O <sub>3</sub> S                   | ×                        | 10                      | 92 ± 10                      |
| 68259-12-1                                             | Perfluorononanesulfonic acid                | PFNS         | C <sub>9</sub> HF <sub>19</sub> O <sub>3</sub> S                   |                          |                         |                              |
| 2806-15-7                                              | Perfluorodecanesulfonic acid                | PFDS         | C <sub>10</sub> F <sub>21</sub> NaO <sub>3</sub> S                 |                          |                         |                              |
| <b>Per and Polyfluoroether carboxylic acid (PFECA)</b> |                                             |              |                                                                    |                          |                         |                              |
| 674-13-5                                               | Perfluoro-2-methoxyacetic acid              | PFMOAA       | C <sub>3</sub> HF <sub>5</sub> O <sub>3</sub>                      |                          |                         |                              |
| 267239-61-2                                            | Perfluoro-2-ethoxypropanoic acid            | PEPA         | C <sub>5</sub> HF <sub>9</sub> O <sub>3</sub>                      |                          |                         |                              |
| 39492-89-2                                             | Perfluoro-3,5,7-trioxaoctanoic acid         | PFO3OA       | C <sub>5</sub> HF <sub>9</sub> O <sub>5</sub>                      |                          |                         |                              |
| 13252-13-6                                             | Perfluoro-2-propoxypropanoic acid           | Gen-X        | C <sub>6</sub> HF <sub>11</sub> O <sub>3</sub>                     | ×                        | 10                      | 83 ± 10                      |
| 39492-90-5                                             | Perfluoro-3,5,7,9-butaoadecanoic acid       | PFO4DA       | C <sub>5</sub> HF <sub>9</sub> O <sub>5</sub>                      |                          |                         |                              |
| 39492-91-6                                             | Perfluoro-3,5,7,9,11-pentaoadodecanoic acid | PFO5DoDA     | C <sub>7</sub> HF <sub>13</sub> O <sub>7</sub>                     |                          |                         |                              |
| 773804-62-9                                            | Perfluoroethoxyspropanoic acid              | Hydro-EVE    | C <sub>8</sub> H <sub>2</sub> F <sub>14</sub> O <sub>4</sub>       |                          |                         |                              |
| 919005-14-4                                            | 4,8-Dioxa-3H-perfluorononanoic acid         | NaDONA       | C <sub>7</sub> H <sub>2</sub> F <sub>12</sub> O <sub>4</sub>       |                          |                         |                              |
| <b>Per and Polyfluoroether sulfonic acid (PFESA)</b>   |                                             |              |                                                                    |                          |                         |                              |

|                                                     |                                                                                |                    |                             |   |      |              |
|-----------------------------------------------------|--------------------------------------------------------------------------------|--------------------|-----------------------------|---|------|--------------|
| 29311-67-9                                          | Perfluoro-3,6-dioxa-4-methyl-7-octene-1-sulfonic acid                          | Nafion byproduct 1 | $C_7HF_{13}O_5S$            |   |      |              |
| 749836-20-2                                         | Perfluoro-2-[[perfluoro-3-(perfluoroethoxy)-2-propanyl]oxy]ethanesulfonic acid | Nafion byproduct 2 | $C_7H_2F_{14}O_5S$          |   |      |              |
| 801209-99-4                                         | 1,1,2,2-tetrafluoro-2-(1,2,2,2-tetrafluoroethoxy)ethanesulfonic acid           | NVHOS              | $C_4H_2F_8O_4S$             |   |      |              |
| 73606-19-6                                          | 9-chlorohexadecafluoro-3-oxanonane-1-sulfonate                                 | F53 Major          | $C_8ClF_{16}KO_4S$          |   |      |              |
| 83329-89-9                                          | 11-chloroeicosafuoro-3-oxaundecane-1-sulfonate                                 | F53 Minor          | $C_{10}ClF_{20}KO_4S$       |   |      |              |
| <b>Per and Polyfluoroalkyl sulfonamides (PFSAm)</b> |                                                                                |                    |                             |   |      |              |
| 30334-69-1                                          | Perfluorobutane sulfonamide                                                    | PFBSA              | $C_4H_2F_9NO_2S$            |   |      |              |
| 41997-13-1                                          | Perfluorohexane sulfonamide                                                    | PFHxSA             | $C_6H_2F_{13}NO_2S$         |   |      |              |
| 2355-31-9                                           | N-methyl perfluorooctanesulfonamidoacetic acid                                 | nMeFOSAA           | $C_{11}H_6F_{17}NO_4S$      | × |      |              |
| 2991-50-6                                           | N-ethyl perfluorooctanesulfonamidoacetic acid                                  | nEtFOSAA           | $C_{12}H_8F_{17}NO_4S$      | × |      |              |
| 754-91-6                                            | Perfluorooctane sulfonamide                                                    | PFOSA              | $C_8H_2F_{17}NO_2S$         | × | 1000 | $103 \pm 12$ |
| 31506-32-8                                          | N-Methylperfluorooctanesulfonamide                                             | N-MeFOSA           | $C_9H_4F_{17}NO_2S$         | × |      |              |
| <b>Fluorotelomer carboxylic acids (FTCA)</b>        |                                                                                |                    |                             |   |      |              |
| 914637-49-3                                         | 3-Perfluoropentyl-propanoic acid                                               | 5:3 FTCA           | $C_8H_5F_{11}O_2$           |   | 2500 | $101 \pm 7$  |
| 53826-12-3                                          | 2-Perfluorohexyl-ethanoic acid                                                 | 6:2 FTCA           | $C_8H_3F_{13}O_2$           | × | 2500 | $83 \pm 3$   |
| 27854-31-5                                          | 2-Perfluorooctyl-ethanoic acid                                                 | 8:2 FTCA           | $C_{10}H_3F_{17}O_2$        | × | 2500 | $91 \pm 7$   |
| 812-70-4                                            | 3-Perfluoroheptyl propanoic acid                                               | 7:3 FTCA           | $C_{10}H_5F_{15}O_2$        |   | 2500 |              |
| 70887-88-6                                          | 2H-Perfluoro-2-octenoic acid                                                   | 6:2 FTUCA          | $C_8H_2F_{12}O_2$           | × | 2500 | $93 \pm 1$   |
| 70887-84-2                                          | 2H-Perfluoro-2-decenoic acid                                                   | 8:2 FTUCA          | $C_8H_2F_{12}O_2$           | × | 2500 | $106 \pm 2$  |
| <b>Fluorotelomer sulfonic acids (FTS)</b>           |                                                                                |                    |                             |   |      |              |
| 757124-72-4                                         | 4:2 Fluorotelomer sulfonic acid                                                | 4:2 FTS            | $C_6H_3F_9O_3S$             | × | 1.6  | $82 \pm 9$   |
| 27619-97-2                                          | 6:2 Fluorotelomer sulfonic acid                                                | 6:2 FTS            | $C_8H_5F_{13}O_3S$          | × | 5    | $87 \pm 12$  |
| 39108-34-4                                          | 8:2 Fluorotelomer sulfonic acid                                                | 8:2 FTS            | $C_{10}H_5F_{17}O_3S$       | × | 10   | $91 \pm 13$  |
| 120226-60-0                                         | 10:2 Fluorotelomer sulfonic acid                                               | 10:2 FTS           | $C_{12}H_5F_{21}O_3S$       | × | 5    | $89 \pm 16$  |
| <b>Zwitterionic</b>                                 |                                                                                |                    |                             |   |      |              |
| 50598-28-2                                          | N-(3-dimethylaminopropan-1-yl)perfluoro-1-hexane-sulfonamide                   | N-AP-FHxSA         | $C_{11}H_{13}F_{13}N_2O_2S$ |   |      |              |

|            |                                                                          |                          |                             |
|------------|--------------------------------------------------------------------------|--------------------------|-----------------------------|
| 38850-51-0 | N-[3-(perfluoro-1-hexanesulfonamido)propan-1-yl]-N,N,N-trimethylammonium | N-TAmP-FHxSA             | $C_{12}H_{15}F_{13}N_2O_2S$ |
| 34455-29-3 | 6:2 Fluorotelomer sulfonamide betaine                                    | N-CMAmP-62FOSA (62 FTAB) | $C_{15}H_{19}F_{13}N_2O_4S$ |

---

<sup>a</sup>Included in the Fluoryx Mix.

<sup>b</sup>The green highlighted compounds are within the range of 70 to 130%. Uncolored compounds did not pass the data quality control. 24 out of 52 analytes passed the data quality control, and average % recovery and standard deviation were added to these compounds.

<sup>c</sup>All PFAS with “x” in the same row have match IS in the method.

<sup>d</sup>LOQ: Limit of quantitation.

<sup>e</sup>Average of 5 standard additions.

**Table S6.** List of 21 target analytes in EPA 537M method used for ionic PFAS background check of the reactor system. Samples were analyzed using LC-MS/MS by SGS North America Inc.

| CAS no.                                       | Analyte                                         | Acronym        | Neutral Molecular Formula                                        | RL <sup>a</sup> (µg/L) | MDL <sup>b</sup> (µg/L) |
|-----------------------------------------------|-------------------------------------------------|----------------|------------------------------------------------------------------|------------------------|-------------------------|
| <b>Perfluoroalkylcarboxylic Acids (PFCA)</b>  |                                                 |                |                                                                  |                        |                         |
| 375-22-4                                      | Perfluorobutanoic acid                          | PFBA           | C <sub>4</sub> HF <sub>7</sub> O <sub>2</sub>                    | 0.0080                 | 0.0040                  |
| 2706-90-3                                     | Perfluoropentanoic acid                         | PFPeA          | C <sub>5</sub> HF <sub>9</sub> O <sub>2</sub>                    | 0.0040                 | 0.0020                  |
| 307-24-4                                      | Perfluorohexanoic acid                          | PFHxA          | C <sub>6</sub> HF <sub>11</sub> O <sub>2</sub>                   | 0.0040                 | 0.0020                  |
| 375-85-9                                      | Perfluoroheptanoic acid                         | PFHpA          | C <sub>7</sub> HF <sub>13</sub> O <sub>2</sub>                   | 0.0040                 | 0.0020                  |
| 335-67-1                                      | Perfluorooctanoic acid                          | PFOA           | C <sub>8</sub> HF <sub>15</sub> O <sub>2</sub>                   | 0.0040                 | 0.0020                  |
| 375-95-1                                      | Perfluorononanoic acid                          | PFNA           | C <sub>9</sub> HF <sub>17</sub> O <sub>2</sub>                   | 0.0040                 | 0.0020                  |
| 335-76-2                                      | Perfluorodecanoic acid                          | PFDA           | C <sub>10</sub> HF <sub>19</sub> O <sub>2</sub>                  | 0.0040                 | 0.0020                  |
| 2058-94-8                                     | Perfluoroundecanoic acid                        | PFAA           | C <sub>11</sub> HF <sub>21</sub> O <sub>2</sub>                  | 0.0040                 | 0.0020                  |
| 307-55-1                                      | Perfluorododecanoic acid                        | PFDoA          | C <sub>12</sub> HF <sub>23</sub> O <sub>2</sub>                  | 0.0040                 | 0.0020                  |
| 72629-94-8                                    | Perfluorotridecanoic acid                       | PFTTrDA        | C <sub>13</sub> HF <sub>25</sub> O <sub>2</sub>                  | 0.0040                 | 0.0020                  |
| 376-06-7                                      | Perfluorotetradecanoic acid                     | PFTA           | C <sub>14</sub> HF <sub>27</sub> O <sub>2</sub>                  | 0.0040                 | 0.0020                  |
| <b>Perfluoroalkylesulfonic Acids</b>          |                                                 |                |                                                                  |                        |                         |
| 375-73-5                                      | Perfluorobutanesulfonic acid                    | PFBS           | C <sub>4</sub> HF <sub>9</sub> O <sub>3</sub> S                  | 0.0040                 | 0.0020                  |
| 355-46-4                                      | Perfluorohexanesulfonic acid                    | PFHxS          | C <sub>6</sub> HF <sub>13</sub> O <sub>3</sub> S                 | 0.0040                 | 0.0020                  |
| 1763-23-1                                     | Perfluorooctanesulfonic acid                    | PFOS           | C <sub>8</sub> HF <sub>17</sub> O <sub>3</sub> S                 | 0.0040                 | 0.0020                  |
| <b>Perfluorooctanesulfonamides</b>            |                                                 |                |                                                                  |                        |                         |
| 754-91-6                                      | Perfluorooctanesulfonamide                      | PFOSA          | C <sub>8</sub> H <sub>2</sub> F <sub>17</sub> NO <sub>2</sub> S  | 0.0080                 | 0.0040                  |
| <b>Perfluorooctanesulfonamidoacetic Acids</b> |                                                 |                |                                                                  |                        |                         |
| 2355-31-9                                     | N-Methylperfluorooctanesulfonamidoacetic acid   | MeFOSAA        | C <sub>11</sub> H <sub>6</sub> F <sub>17</sub> NO <sub>4</sub> S | 0.0080                 | 0.0040                  |
| 2991-50-6                                     | N-ethyl perfluorooctane sulfonamido acetic acid | EtFOSAA        | C <sub>12</sub> H <sub>8</sub> F <sub>17</sub> NO <sub>4</sub> S | 0.0080                 | 0.0040                  |
| <b>Fluorotelomer Sulfonates</b>               |                                                 |                |                                                                  |                        |                         |
| 757124-72-4                                   | 4:2 Fluorotelomer sulfonate                     | 4:2 FTS        | C <sub>6</sub> H <sub>5</sub> F <sub>9</sub> O <sub>3</sub> S    | 0.016                  | 0.0040                  |
| 27619-97-2                                    | 6:2 Fluorotelomer sulfonate                     | 6:2 FTS        | C <sub>8</sub> H <sub>5</sub> F <sub>13</sub> O <sub>3</sub> S   | 0.016                  | 0.0040                  |
| 39108-34-4                                    | 8:2 Fluorotelomer sulfonate                     | 8:2 FTS        | C <sub>10</sub> H <sub>5</sub> F <sub>17</sub> O <sub>3</sub> S  | 0.016                  | 0.0040                  |
| <b>Next Generation PFAS Analytes</b>          |                                                 |                |                                                                  |                        |                         |
| 13252-13-6                                    | Hexafluoropropylene oxide dimer acid            | HFPO-DA (GenX) | C <sub>6</sub> HF <sub>11</sub> O <sub>3</sub>                   | 0.0080                 | 0.0040                  |

<sup>a</sup>RL: Reporting Limit

<sup>b</sup>MDL: Method Detection Limit

**Table S7.** Mass of materials and volume of inoculum added to each reactor and the extent of cellulose and hemicellulose decomposition in each material.<sup>a</sup>

| Reactor Information |                     |                         | Fresh Material              |               |                   |                 | After Decomposition         |               |                   | Decomposition Extent (%) |                        |
|---------------------|---------------------|-------------------------|-----------------------------|---------------|-------------------|-----------------|-----------------------------|---------------|-------------------|--------------------------|------------------------|
| Reactor Groups      | Substrates content  | Volume of Inoculum (mL) | Mass of dried substrate (g) | Cellulose (%) | Hemicellulose (%) | Extractives (%) | Mass of dried substrate (g) | Cellulose (%) | Hemicellulose (%) | Cellulose Loss (%)       | Hemicellulose Loss (%) |
| <b>High F</b>       | natural plates      | 1900                    | 100.2                       | 67.86         | 22.12             | 0.04            | 10.67                       | 8.15          | 2.80              | 98.72                    | 98.65                  |
|                     |                     | 1900                    | 100                         |               |                   |                 | 46.39                       | 70.19         | 10.35             | 52.02                    | 78.29                  |
|                     |                     | 1900                    | 100.3                       |               |                   |                 | 26.05                       | 9.99          | 3.00              | 96.18                    | 96.48                  |
|                     | Popcorn Bags 1      | 1900                    | 100.3                       | 61.97         | 10.19             | 3.05            | NA                          |               |                   | NA                       |                        |
|                     | compostable bowls   | 1900                    | 100.4                       | 61.7          | 25.61             | 1.36            | 6.37                        | Missing       | Missing           | Missing                  | Missing                |
|                     | biodegradable boxes | 1900                    | 99.9                        | 62.36         | 25.09             | 1.58            | 19.02                       | 5.12          | 1.9               | 98.44                    | 98.56                  |
|                     | bagasse containers  | 1900                    | 100.5                       | 71            | 19.89             | 0.21            | 35.52                       |               |                   |                          |                        |
|                     | eco-friendly plates | 1900                    | 99.9                        | 66.33         | 22.02             | 0.91            | 18.04                       | 53.1          | 10.76             | 85.54                    | 91.18                  |
| <b>Low F</b>        | Popcorn Bags 2      | 1800                    | 100.4                       | 65.3          | 7.63              | 11.87           | 22.8                        | 27.19         | 4.57              | 86.75                    | 86.06                  |
|                     |                     |                         |                             | 59.54         | 10.98             | 16.09           |                             |               |                   |                          |                        |
| <b>Control</b>      | Low F a             | 1500                    | 101                         | 57.62         | 14.00             | 1.58            | 37.54                       | 27.69         | 10.09             | 82.14                    | 73.22                  |
|                     | Low F b             | 1500                    | 100.2                       |               |                   |                 | 17.13                       | 20.28         | 7.94              | 104.73                   | 90.31                  |
| <b>MSW</b>          | Control 1           | 1503                    | 100.1                       | 97.04         | 1.14              | 17.98           | 6.52                        | 40.52         | 0.86              | 97.28                    | 95.09                  |
|                     | Control 2           | 1900                    | 100.06                      |               |                   |                 | 0                           |               |                   | 100.00                   | 100.00                 |
| <b>MSW</b>          | MSW-May a           | 1900                    | 363.2                       | 31.44         | 6.91              | 16.75           | NA                          | NA            | NA                | NA                       | NA                     |
|                     | MSW-May b           | 1500                    | 164.2                       |               |                   |                 |                             |               |                   |                          |                        |
|                     | MSW-August a        | 1700                    | 284.1                       | 34.49         | 6.48              | 14.34           |                             |               |                   |                          |                        |
|                     | MSW-August b        | 1500                    | 140.6                       |               |                   |                 |                             |               |                   |                          |                        |

<sup>a</sup>Decomposition is 1 minus the mass of cellulose or hemicellulose recovered at the end of the decomposition cycle divided by the initial mass.

**Table S8.** Volatile PFAS released in Popcorn Bags 1 reactor after 27 days and Popcorn Bags 2 reactor at day 29 and day 203 (final day).

| PFAS yield (ng/g bag) | Popcorn bag 1 day 27 | Popcorn bag 2-day 29 | Popcorn bag 2-day 203 |
|-----------------------|----------------------|----------------------|-----------------------|
| 4:2 FTOH              | 0.00213              | 0                    | 0                     |
| 6:2 FTOH              | 14.56                | 52.8                 | 99.5                  |
| 8:2 FTOH              | 0.0062               | 0                    | 0                     |
| 10:2 FTOH             | 0.025                | 0                    | 0                     |
| MeFOSA                | 0.0045               | 0                    | 0                     |
| EtFOSA                | 0.0079               | 0                    | 0                     |
| 6:2 FTAc              | 0.00044              | 0                    | 0                     |
| 8:2 FTAc              | 0.038                | 0                    | 0                     |
| 10:2 FTAc             | 0.0068               | 0                    | 0                     |
| 8:2 FTMAc             | 0.011                | 0                    | 0                     |
| 6:2 FTO               | 0.84                 | 0                    | 0.0017                |
| 8:2 FTO               | 0.0055               | 0                    | 0                     |
| 10:2 FTO              | 0.0016               | 0                    | 0                     |
| 12:2 FTO              | 0.003                | 0                    | 0.011                 |
| PFHxI                 | 4.7                  | 0                    | 0                     |
| PFOI                  | 0.081                | 0                    | 0                     |
| 4:2 FTI               | 0.045                | 0                    | 0                     |
| 6:2 FTI               | 0.0083               | 0                    | 0                     |
| 7:2-sFTOH             | 0.083                | 0                    | 0                     |

**Table S9.** Measured 6:2 FTOH concentration ranges in the generated gas for each high F material.

| Reactors            | Min (ng/L gas) | Max (ng/L gas) |
|---------------------|----------------|----------------|
| Popcorn bags 1      | 0              | 1220           |
| Popcorn bags 2      | 0              | 457            |
| Compostable Bowls   | 2              | 5433           |
| Biodegradable Boxes | 250            | 2190           |
| Bagasse Containers  | 101            | 602            |
| Eco-friendly Plates | 284            | 675            |
| Natural Plates a    | <LOD           | 5630           |
| Natural Plates b    | <LOD           | 3280           |
| Natural Plates c    | 127            | 3570           |

**Table S10.** Cumulative volatile PFAS yield in Low F and MSW reactors (ng/g) at the end of the monitoring period.<sup>a</sup>

| PFAS (ng/g)                 | Reactors  |              |              |              |       |           |
|-----------------------------|-----------|--------------|--------------|--------------|-------|-----------|
|                             | MSW-May a | MSW-May b    | MSW-August a | MSW-August b | Low F |           |
|                             |           |              |              |              | a     | b         |
| 6:2 FTOH                    | <LOQ      | <LOQ         | <LOQ         | <LOQ         | <LOQ  | 0.0066    |
| <b>6:2 FTOH<sup>b</sup></b> |           | <b>14000</b> |              | <b>8000</b>  |       | <b>NA</b> |
| 8:2 FTOH                    | <LOQ      | <LOQ         | <LOQ         | <LOQ         | <LOQ  | 0.0033    |
| 10:2 FTOH                   | <LOQ      | <LOQ         | <LOQ         | 0.013        | 0.02  | 0.0045    |
| 7:2-sFTOH                   | 0.034     | 0.62         | 0.1          | 0.135        | 0.07  | 0.4       |
| ΣPFAS                       | 0.078     | 0.62         | 0.1          | 0.148        | 0.09  | 0.41      |

<sup>a</sup>if a compound is LOD in every case, then it was not included.

<sup>b</sup>6:2 FTOH in ground MSW material prior to testing.



**Table S11.** Cumulative PFAS yield (ng/g) in leachate for all reactors and the ratio of FTCA released in leachate to 6:2 FTOH released to gas phase.

| Reactor groups                                                                         | PFBA  | PFPeA | PFHxA | PFHpA | PFOA <sup>b</sup> | 4:2 FTS | 6:2 FTS | GenX  | 5:3 FTCA          | 6:2 FTCA           | Summed FTCAs | Summed PFAS (Leachate) | Summed PFAS (gas) | Summed FTCAs/6:2 FTOH in gas phase |
|----------------------------------------------------------------------------------------|-------|-------|-------|-------|-------------------|---------|---------|-------|-------------------|--------------------|--------------|------------------------|-------------------|------------------------------------|
| high F-Natural Plates (a,b,c)                                                          | 2.64  | 0.906 | 9.83  | 0.245 |                   | 0.034   |         |       | 115               | 220                | 335          | 340                    | 799               | 0.42                               |
|                                                                                        | 4.71  | 0.228 | 6.2   |       |                   |         |         |       | 410               | 142                | 553          | 561                    | 487               | 1.13                               |
|                                                                                        | 10.1  | 0.314 | 11.4  |       |                   |         |         |       | 342               | 130                | 472          | 445                    | 556               | 0.85                               |
| high F-Compostable Bowls                                                               | 2.77  | 1.3   | 14.3  | 0.07  |                   |         | 0.01    |       | 225               | 154                | 379          | 279                    | 343               | 1.11                               |
| high F-Biodegradable Boxes                                                             | 2.29  | 0.173 | 4.7   |       |                   |         |         |       | 176               | 93                 | 269          | 276                    | 484               | 0.57                               |
| high F-Bagasse Containers                                                              | 3.07  | 1.45  | 11.9  | 1.13  |                   |         | 0.045   |       | 182               | 58                 | 240          | 257                    | 125               | 1.98                               |
| high F-Eco-friendly Plates                                                             | 4.98  | 1.47  | 18.3  | 1.1   |                   |         | 0.098   | 0.001 |                   |                    |              | 25.6                   | 62                |                                    |
| high F-Popcorn Bag 1                                                                   | 0.009 | 0     | 0.757 | 0.203 |                   |         |         |       |                   |                    |              | 0.96                   | 20.4              |                                    |
| high F-Popcorn Bag 2                                                                   | <LOD  |       | 0.862 | 0.648 |                   |         | 0.029   |       | <sup>a</sup> <LOQ | <sup>a</sup> < LOQ |              | 15.9                   | 99.7              |                                    |
| Low F-mixed paper plates, eco-friendly food trays, and polycoated freezer paper (A, B) | 0.793 | 0.284 |       |       |                   |         |         |       |                   |                    |              | 1.02                   | 0.09              |                                    |
|                                                                                        | 0.254 | 0.32  |       |       |                   |         | 0.116   | 0.08  |                   |                    |              | 0.488                  | 0.41              |                                    |
| MSW-May (a, b)                                                                         | 3.57  | 0.378 | 0.095 |       | 0.074             |         | 0.057   | 0.029 |                   |                    |              | 4.09                   | 0.078             |                                    |
|                                                                                        | 0.129 | 0.113 | 0.003 |       |                   |         | 0.04    |       |                   |                    |              | 0.197                  | 0.62              |                                    |
| MSW-August (a, b)                                                                      | 0.212 | 0.314 |       |       |                   |         |         |       |                   |                    |              | 0.525                  | 0.1               |                                    |
|                                                                                        |       | 0.335 |       |       |                   |         |         | 0.004 |                   |                    |              | 0.335                  | 0.148             |                                    |

<sup>a</sup>LOQ is 2500 ng/L.

<sup>b</sup>In the case of PFOA, concentrations were 22 to 57% above the highest concentration in a control reactor.

All results <LOD are left empty.

**Table S12.** Profile of volatile PFAS and total F for select samples pre- and post-digestion.

| Reactor group                                                                   | Pre-digestion            |                                                         |                                 |                                     | Post-digestion                                                            |                                                                   |                                                              |                                           |                                                                            |                                                              |                                                                               |
|---------------------------------------------------------------------------------|--------------------------|---------------------------------------------------------|---------------------------------|-------------------------------------|---------------------------------------------------------------------------|-------------------------------------------------------------------|--------------------------------------------------------------|-------------------------------------------|----------------------------------------------------------------------------|--------------------------------------------------------------|-------------------------------------------------------------------------------|
|                                                                                 | Total F from PIGE (ng/g) | Methanol extracted Neutral PFAS (6:2 FTOH) - (ng/dry g) | Methanol extracted Total F (ng) | Methanol extracted/PIGE Total F (%) | Methanol extracted Neutral PFAS (6:2 FTOH) in residual solid - (ng/wet g) | Methanol extracted Total F of neutral PFAS in residual solid (ng) | Summed F of neutral PFAS adsorbed on reactor and gasket (ng) | Summed volatile PFAS released in gas (ng) | Summed F on reactor and gasket/Total F of neutral PFAS released in gas (%) | Summed F of all gas phase neutral PFAS/Total F from PIGE (%) | Summed F in the residual solid/Total F in fresh material methanol extract (%) |
| Low F-mixed paper plates, eco-friendly food trays, and polycoated freezer paper | <LOD <sup>a</sup>        | NA <sup>b</sup>                                         | NA                              | NC <sup>c</sup>                     | <LOD                                                                      | NC                                                                | <LOD                                                         | 9                                         | NC                                                                         | 0                                                            | NC                                                                            |
|                                                                                 | 2280 <sup>d</sup>        |                                                         | NA                              | NC                                  | <LOD                                                                      | NC                                                                | <LOD                                                         | 41                                        | NC                                                                         | 0.002                                                        | NC                                                                            |
|                                                                                 | 64800 <sup>d</sup>       |                                                         |                                 |                                     |                                                                           |                                                                   |                                                              |                                           |                                                                            |                                                              |                                                                               |
| high F-Natural Plates (a,b,c)                                                   | 1590000                  | 3560                                                    | 241000                          | 0.15                                | 20000                                                                     | 1850000                                                           | <LOD                                                         | 80000                                     | NC                                                                         | 0.050                                                        | 767                                                                           |
|                                                                                 |                          |                                                         | 240000                          | 0.15                                | 17000                                                                     | 2393000                                                           | 464                                                          | 48700                                     | 1.4                                                                        | 0.031                                                        | 996                                                                           |
|                                                                                 |                          |                                                         | 241000                          | 0.15                                | 65000                                                                     | 5950000                                                           | 457                                                          | 55700                                     | 1.2                                                                        | 0.035                                                        | 2470                                                                          |
| high F-Compostable Bowls                                                        | 1970000                  | 3730                                                    | 253000                          | 0.13                                | 92000                                                                     | 5330000                                                           | 887                                                          | 34400                                     | 3.8                                                                        | 0.018                                                        | 2110                                                                          |
| high F-Biodegradable Boxes                                                      | 1750000                  | 3420                                                    | 231000                          | 0.13                                | 92000                                                                     | 8370000                                                           | <LOD                                                         | 48300                                     | NC                                                                         | 0.018                                                        | 3630                                                                          |
| high F-Bagasse Containers                                                       | 2610000                  | 3780                                                    | 256000                          | 0.10                                | 160000                                                                    | 17300000                                                          | 745                                                          | 12500                                     | 8.8                                                                        | 0.005                                                        | 6750                                                                          |
| high F-Eco-friendly Plates                                                      | 1810000                  | 6410                                                    | 432000                          | 0.24                                | 130000                                                                    | 18300000                                                          | 327                                                          | 6200                                      | 7.8                                                                        | 0.004                                                        | 4230                                                                          |
| High F-Popcorn Bags                                                             | NA                       | 8310                                                    | 563000                          | NC                                  | 2800                                                                      | 459000                                                            | 47                                                           | 10000                                     | 68.9                                                                       | NC                                                           | 84.9                                                                          |
|                                                                                 | NA                       | 2470                                                    | 167000                          | NC                                  |                                                                           |                                                                   |                                                              |                                           |                                                                            |                                                              |                                                                               |
| MSW-May                                                                         | NA                       | 14000                                                   | 3430000                         | NC                                  | NA                                                                        | NA                                                                | NA                                                           | 28                                        | NC                                                                         | NC                                                           | NC                                                                            |
|                                                                                 |                          |                                                         | 1550000                         |                                     | NA                                                                        |                                                                   | NA                                                           | 102                                       | NC                                                                         | NC                                                           | NC                                                                            |
| MSW-August                                                                      | NA                       | 8000                                                    | 1530000                         | NC                                  | NA                                                                        | NA                                                                | NA                                                           | 31                                        | NC                                                                         | NC                                                           | NC                                                                            |
|                                                                                 |                          |                                                         | 759000                          | NC                                  | NA                                                                        |                                                                   | NA                                                           | 21                                        | NC                                                                         | NC                                                           | NC                                                                            |

<sup>a</sup><LOD: below limit of detection <sup>b</sup>NA: not analyzed <sup>c</sup>NC: not calculated

<sup>d</sup>The average of the three low F substrates (22400) was used for calculations since equal masses of each were added to the duplicate low F reactors

The summed PFAS includes suspect compounds.

**Table S13.** Summed PFAS as F released in leachate and ratio of leachate F to gas phase F.

| <b>Reactor group</b>                                                        | <b>Summed F of ionic PFAS released in leachate (ng)</b> | <b>Total F of ionic PFAS released in leachate/total F released in gas (%)</b> |
|-----------------------------------------------------------------------------|---------------------------------------------------------|-------------------------------------------------------------------------------|
| high F-Natural Plates (a,b,c)                                               | 21800                                                   | 40                                                                            |
|                                                                             | 34400                                                   | 101                                                                           |
|                                                                             | 27700                                                   | 51                                                                            |
| high F-Compostable Bowls                                                    | 15500                                                   | 78                                                                            |
| high F-Biodegradable Boxes                                                  | 17100                                                   | 53                                                                            |
| high F-Bagasse Containers                                                   | 16100                                                   | 195                                                                           |
| high F-Eco-friendly Plates                                                  | 1677                                                    | 51                                                                            |
| high F-Popcorn Bag 2                                                        | 102                                                     | 3                                                                             |
| Low F-mixed paper plates, eco-friendly food trays, polycoated freezer paper | 64                                                      | 2145                                                                          |
|                                                                             | 31                                                      | 496                                                                           |
| MSW-May (a, b)                                                              | 928                                                     | 5963                                                                          |
|                                                                             | 20                                                      | 116                                                                           |
| MSW-August (a, b)                                                           | 95                                                      | 314                                                                           |
|                                                                             | 44                                                      | 414                                                                           |

**Figure S1.** Schematic of the test reactor. **A.** 2L-glass reactor with flange connection part; **B.** drainage layer of pea gravel; **C.** #120 stainless steel woven wire mesh to reduce clogging of the reactor outlet; **D.** glass cap for the reactor with flange connection part; **E.** flange clamps to hold the two-pieces of glass together and keep the system sealed; a 245 EPDM gasket was placed between the two pieces of glass; **F.** stainless steel adjustable clamp; **G.** 10 mL Norm-Ject Luer lock polypropylene syringe; **H.** T-shape plastic 3-way barb fitting, polypropylene, 1/4" OD; **I.** Cole-Parmer female/male Luer hose barb adapter, 1/4" OD; **J.** McMaster quick-disconnect tube couplings, polysulfone, 1/4" OD; **K.** tubing flow control hose clamp, 3/4" OD 54; **L.** stainless steel quick-turn tube couplings, 1/4" OD; **M.** one-way Luer stopcock; **N.** tygon tube, 1/4" ID, flexible, clear, PVC; **O.** 10 L-foil gas bag (SKC. Inc.), **P.** 2L-Thermo Scientific™ Labtainer™ bioProcess container, with 3 Ports, MPC Insert, MPC Body, and Luer lock.

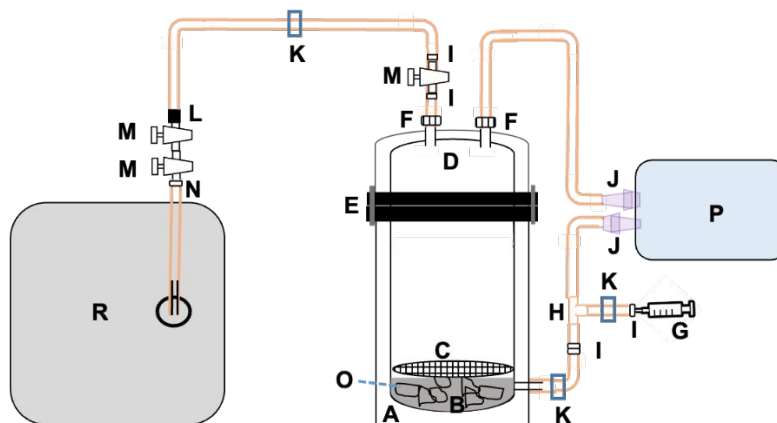

**Figure S2.** Gas sampling system. **A.** 0.5 L-foil gas bag; **B.** check valve; **C.** 160 mL-serum bottle; **D.** H<sub>2</sub>SO<sub>4</sub> aqueous solution (pH <3.7), 1 g/L methyl orange was added as a pH indicator (3.1-4.4); **E.** 18-gauge needles; **F.** rubber stopper to seal serum bottle. **G.** straight adapters, tube push-on barbed hose, 1/4" ID; **H.** Markes Universal gas sampling tube 1/4" OD (IS spiked TD tube); **I.** One-way Luer stopcock.

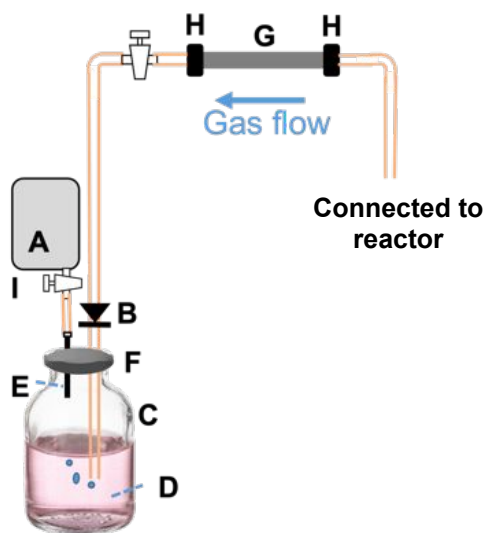

**Figure S3.** Measured PFAS concentrations in the Whatman #2 filter paper Control reactors. **A.** Control 1 reactor and **B.** Control 2 reactor.

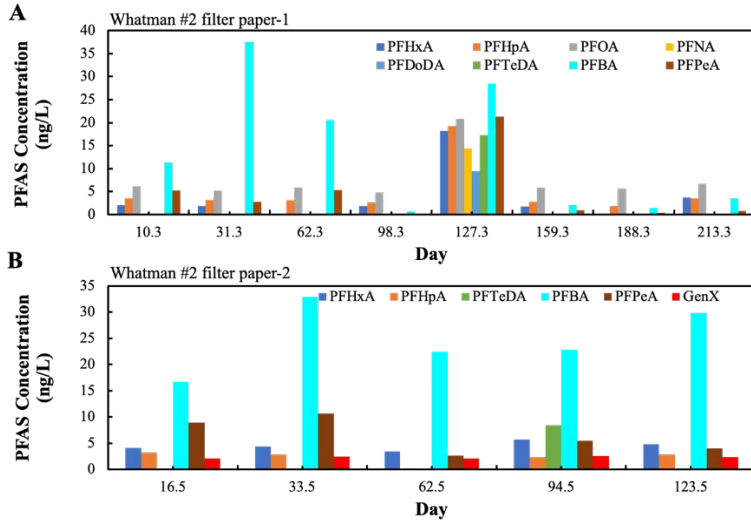

**Figure S4.** pH of all reactors: **A.** Control and Low F; **B.** MSW; **C.** High F (Natural Plates and Popcorn Bags), and **D.** High F (Compostable Bowls, Biodegradable Boxes, Bagasse Containers, and Eco-friendly Plates).

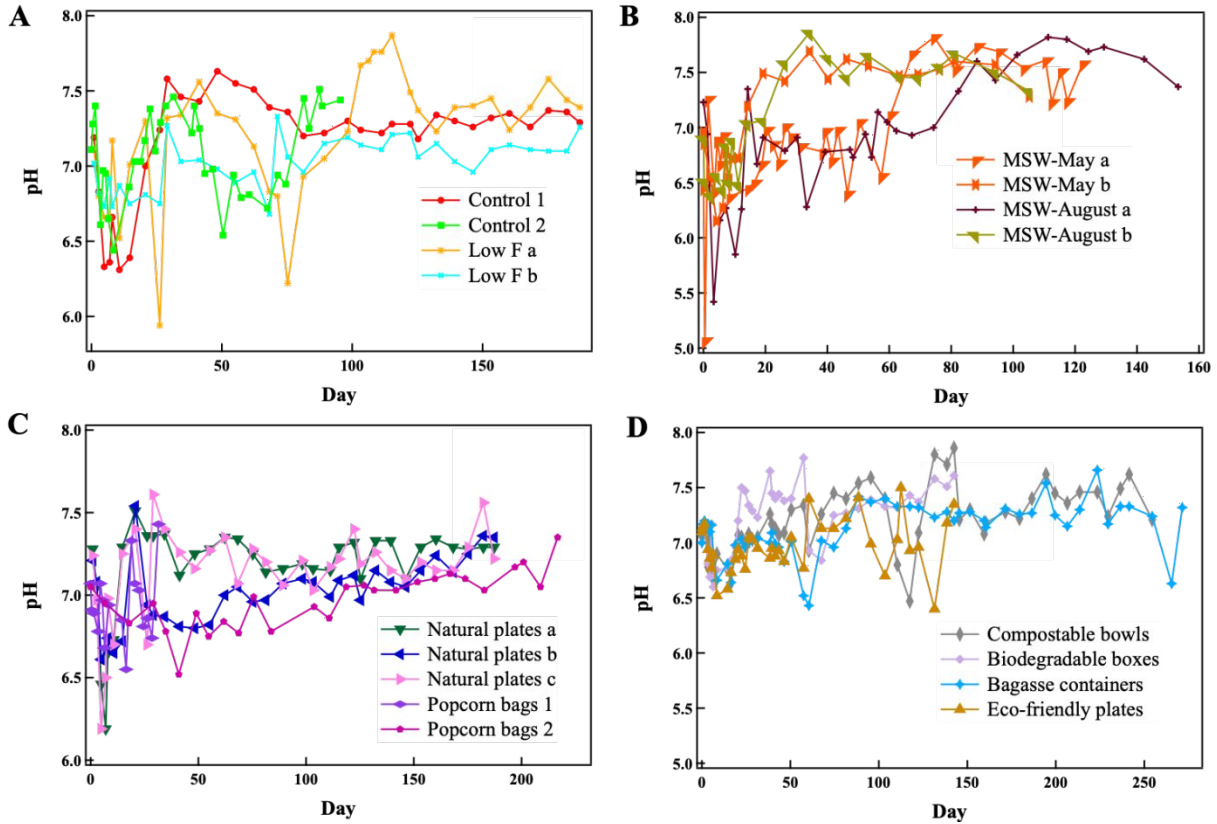

**Figure S5.** CH<sub>4</sub> yield in the reactors of **A.** Whatman #2 filter paper control; **B.** MSW; **C.** Popcorn bags, and **D.** High F (Compostable Bowls, Biodegradable Boxes, Bagasse Containers, and Eco-friendly Plates).

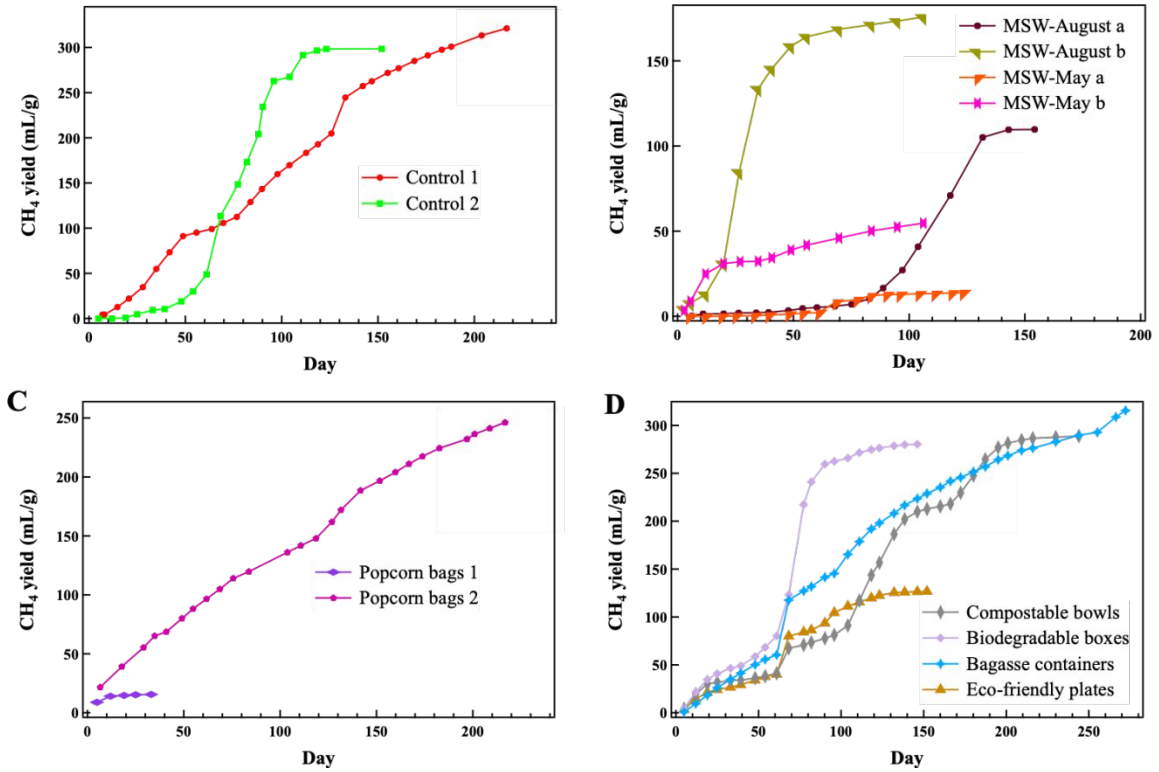

**Figure S6.** CH<sub>4</sub> generation rate (mL/day-dry g) of all reactors: **A.** Control and Low F; **B.** MSW; **C.** High F (Natural Plates and Popcorn Bags), and **D.** High F (Compostable Bowls, Biodegradable Boxes, Bagasse Containers, and Eco-friendly Plates).

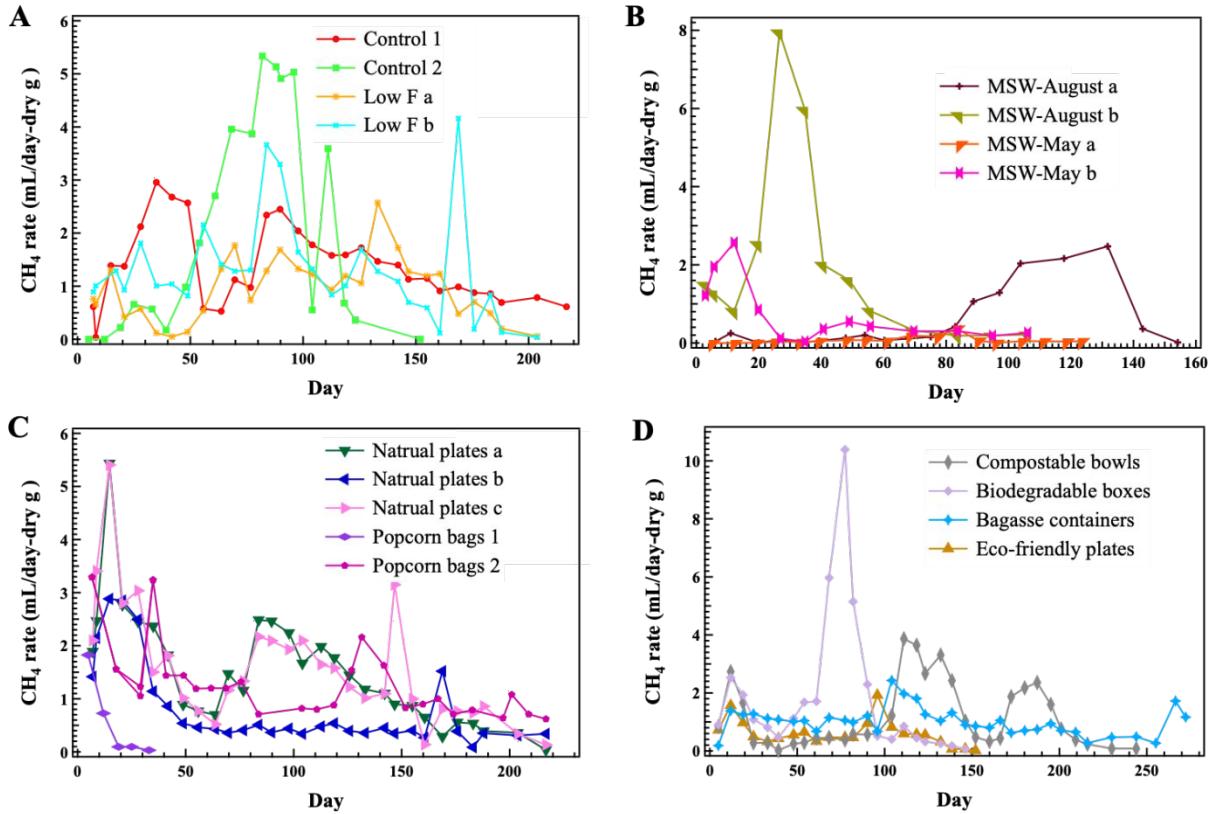

**Figure S7.** The total fluorine concentration of 46 tested materials (5 popcorn bags sampled in 2022 were not tested by PIGE).

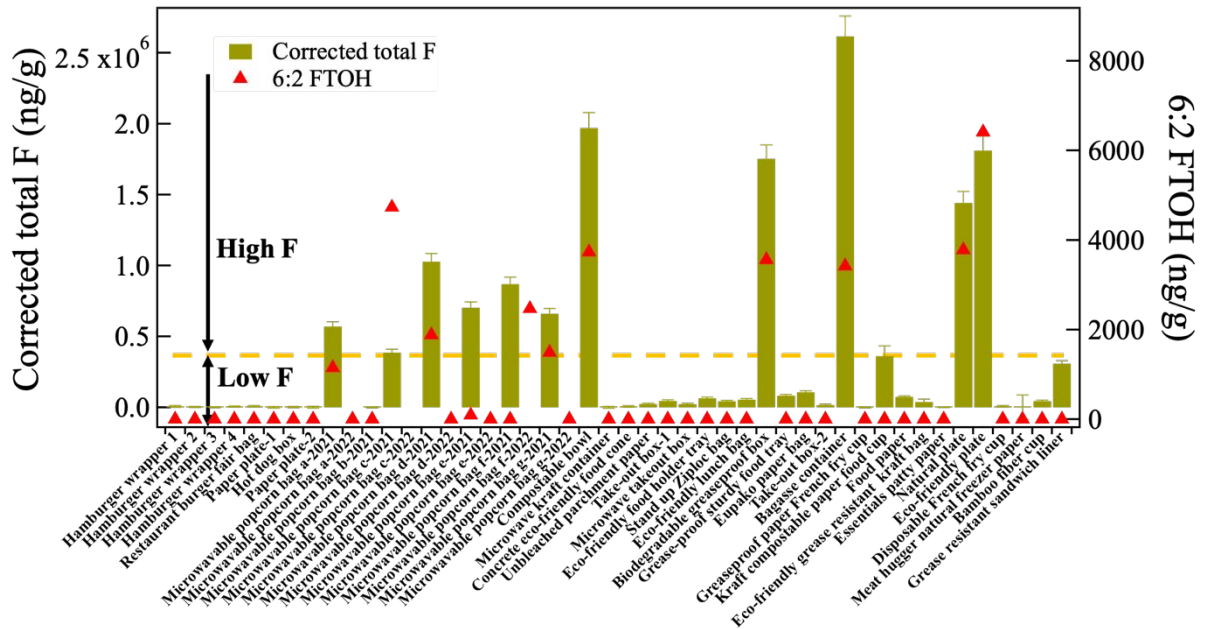



**Figure S8.** Volatile PFAS released from Popcorn Bags 1 reactor during the 27-day monitoring period. PFAS data are presented as a yield. As such, a flat line indicates that no PFAS was detected in a sample. The first gas sampling and detection day was day 12, and concentrations before day 12 are extrapolated.

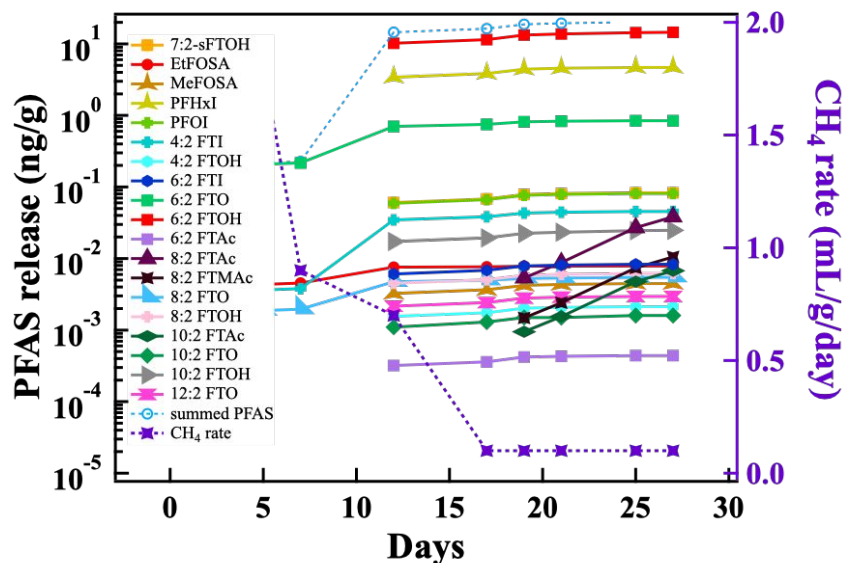

**Figure S9.** Time-dependent release of volatile PFAS to the gas phase in **A.** Natural Plates a and **B.** Natural Plates b. The summed PFAS and 6:2 FTOH lines overlap in both reactors.

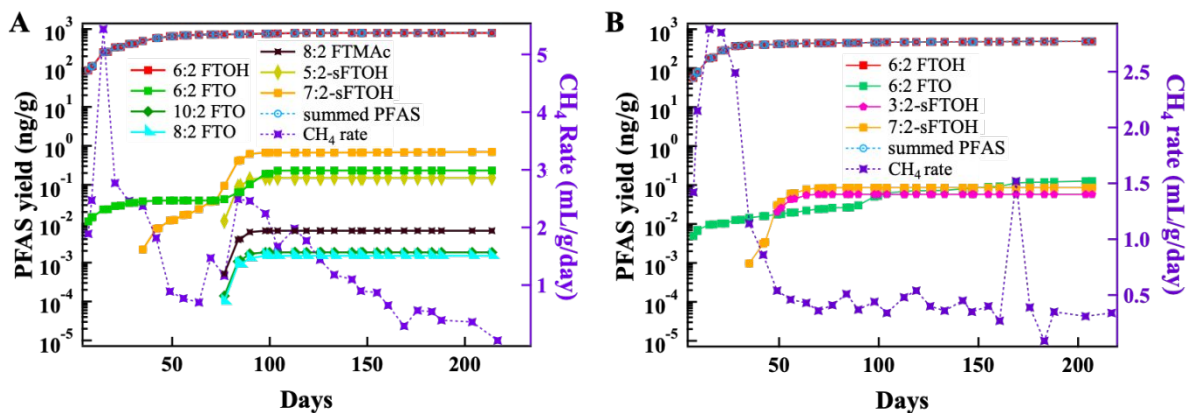

**Figure S10.** Volatile PFAS released from High F reactors. **A.** Compostable Bowls; **B.** Biodegradable Boxes; **C.** Bagasse Containers; **D.** Eco-friendly plates. The summed PFAS and 6:2 FTOH lines overlap in all reactors.

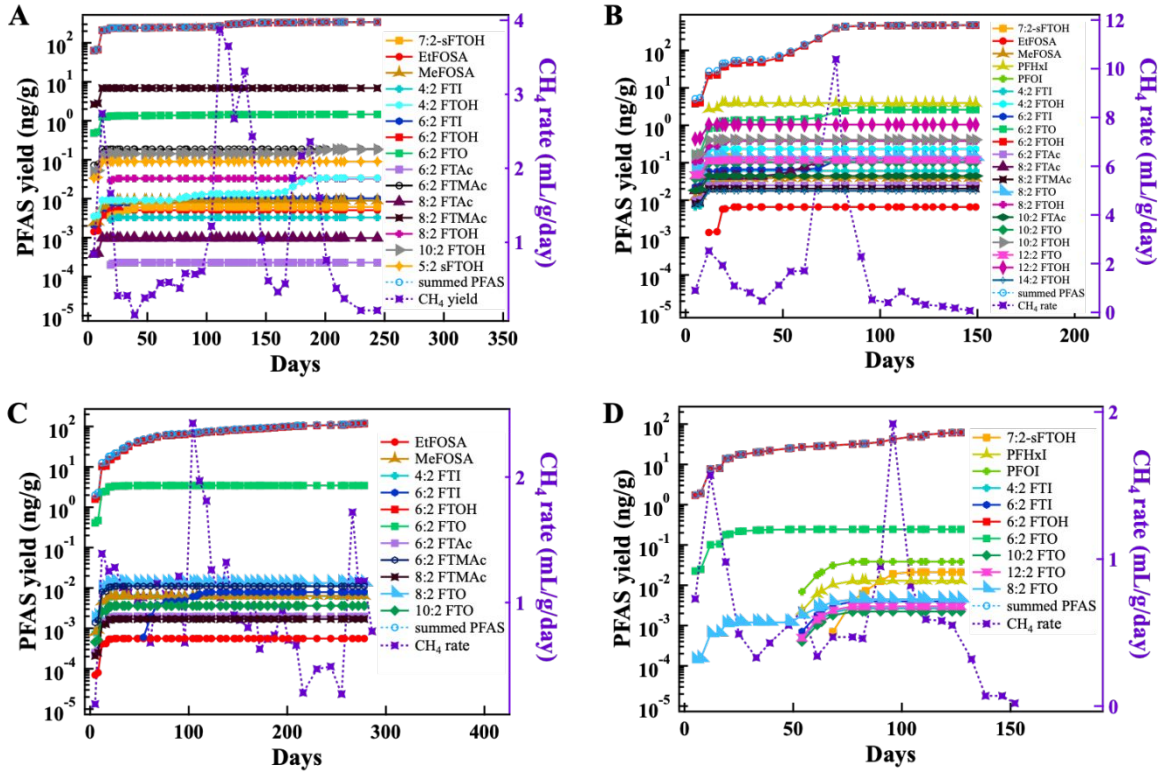

**Figure S11.** Time-dependent release of volatile PFAS in **A.** Low F a, **B.** Low F b, **C.** MSW-August b, and **D.** MSW-May a reactor. The concentration of 7:2-sFTOH was first detected on day 74 for Low F a reactor and day 51 for Low F b reactor, 8:2 FTOH were first detected on day 43 in Low F b reactor, 10:2 FTOH were first detected on day 148 and 43 in Low F a and Low F b reactors; yields of these compounds before first detection were extrapolated. The summed PFAS and 7:2-sFTOH lines overlap in Figure S11C.

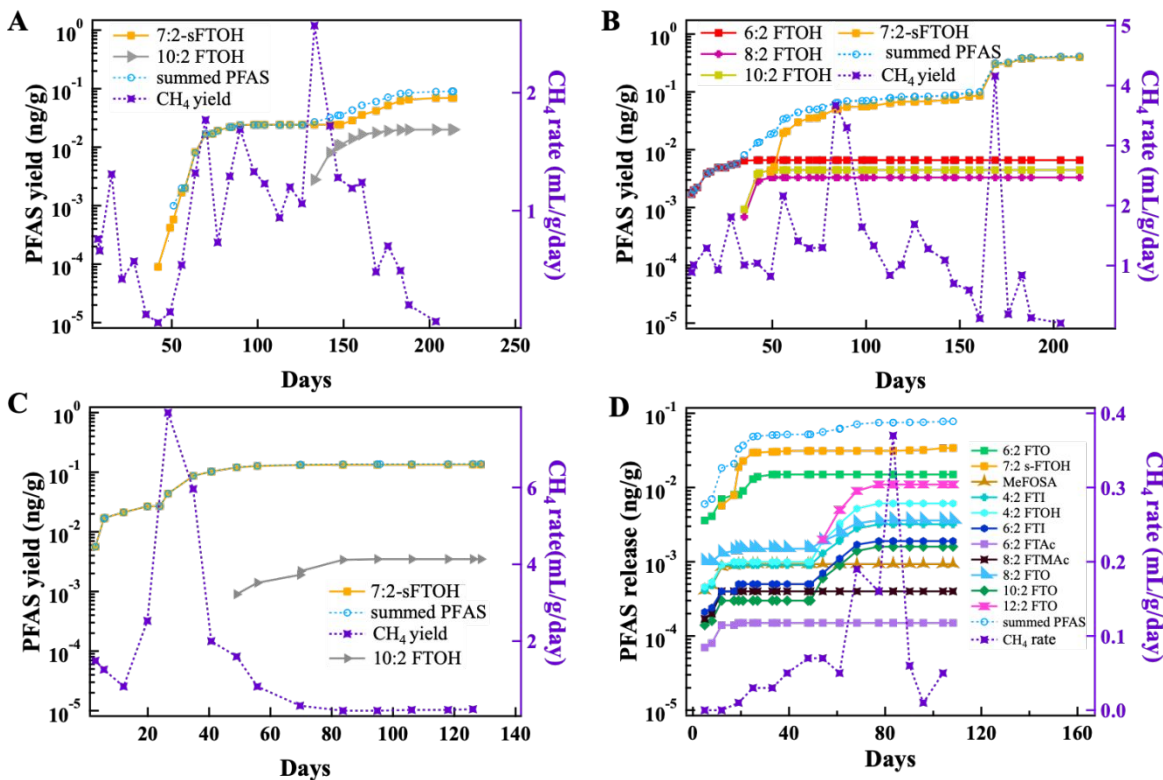

**Figure S12.** PFAS concentration and relative abundance in leachate samples over time for the High F reactors: **A&B.** Compostable Bowls, **C&D.** Biodegradable Boxes, **E&F.** Bagasse Containers, **G&H.** Eco-friendly Plates, **I&J.** Popcorn Bags 1, and **K&L.** Popcorn Bags 2.

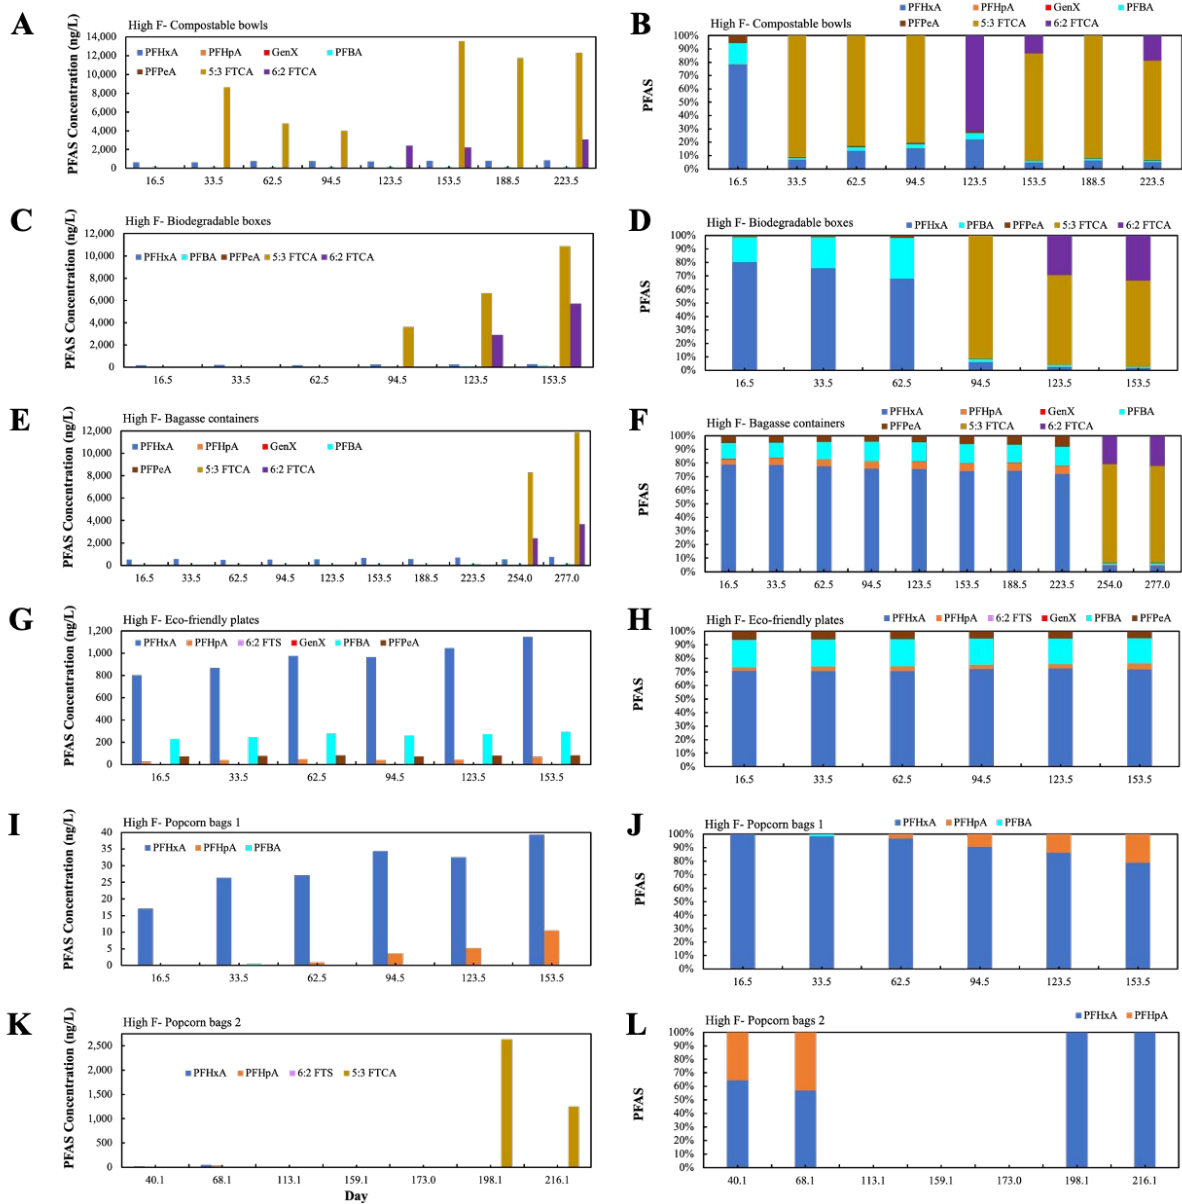

**Figure S13.** PFAS concentration and relative abundance and CH<sub>4</sub> generation rate in the leachate samples over time for: **A&B.** High F Natural Plates a, **C&D.** High F Natural Plates b, and **E&F.** High F Natural Plates c. The discontinuous reporting of FTCA concentrations in Natural Plates a could be due to the high LOQ of 5:3 FTCA (2500 ng/L) and 6:2 FTCA (2500 ng/L).

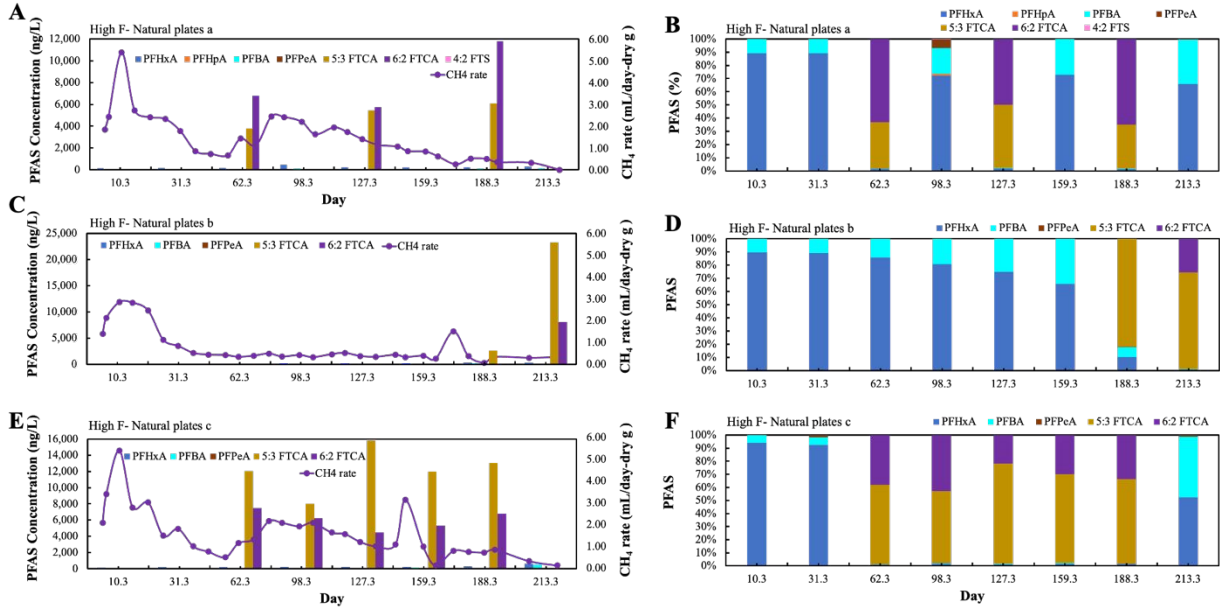

**Figure S14.** The PFAS concentration and relative abundance of each PFAS component in the leachate samples of **A&B.** Low F a **C&D.** Low F b.

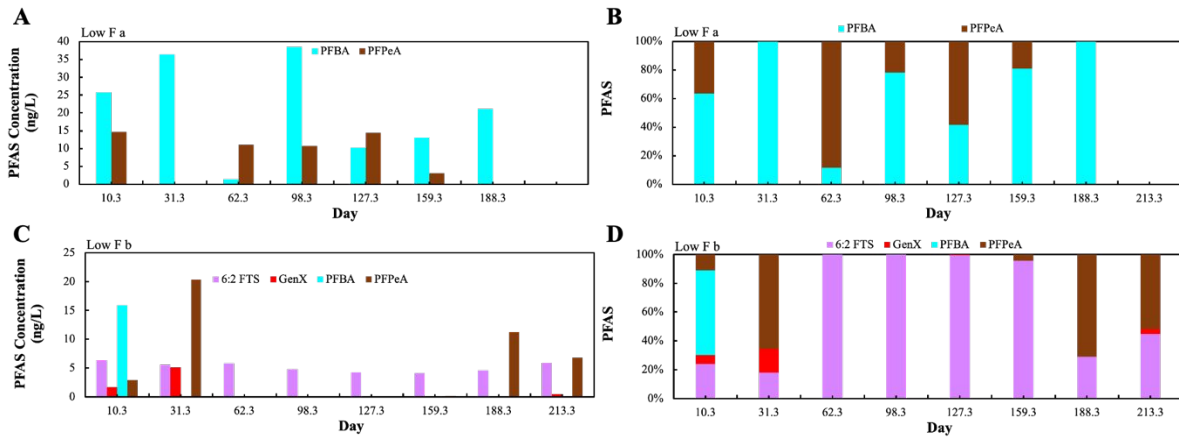

**Figure S15.** The PFAS concentration in the leachate samples of **A.** MSW-May a, **B.** MSW-May b, **C.** MSW-August a, and **D.** MSW-August b. In the case of PFOA, concentrations were 22 to 57% above the highest concentration in a control reactor.

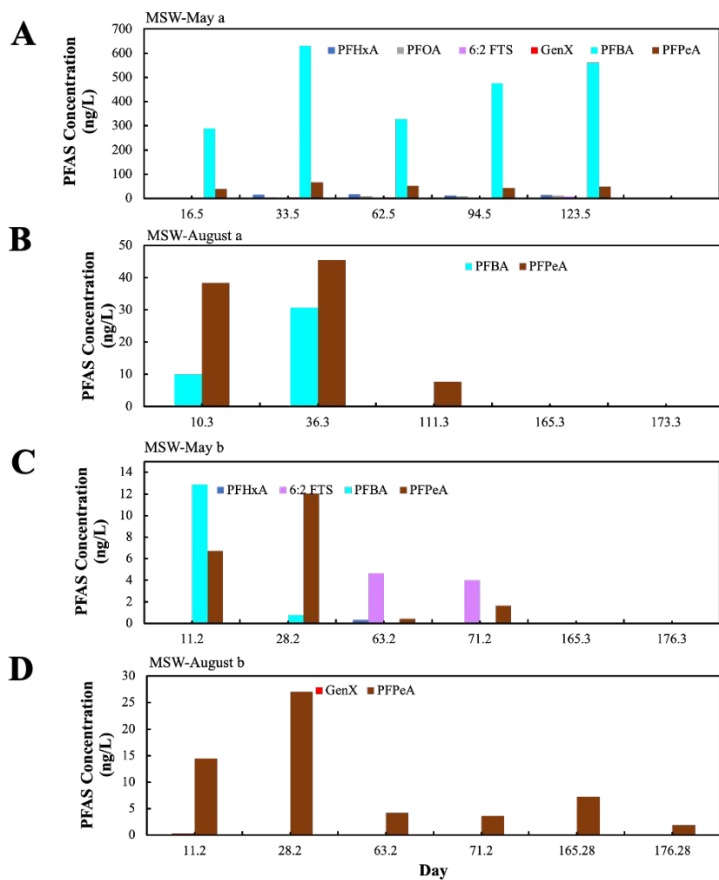

**Figure S16 A.** Cumulative summed and individual ionic PFAS released to leachate from each reactor. **B.** The fraction of each PFAS released to the leachate.

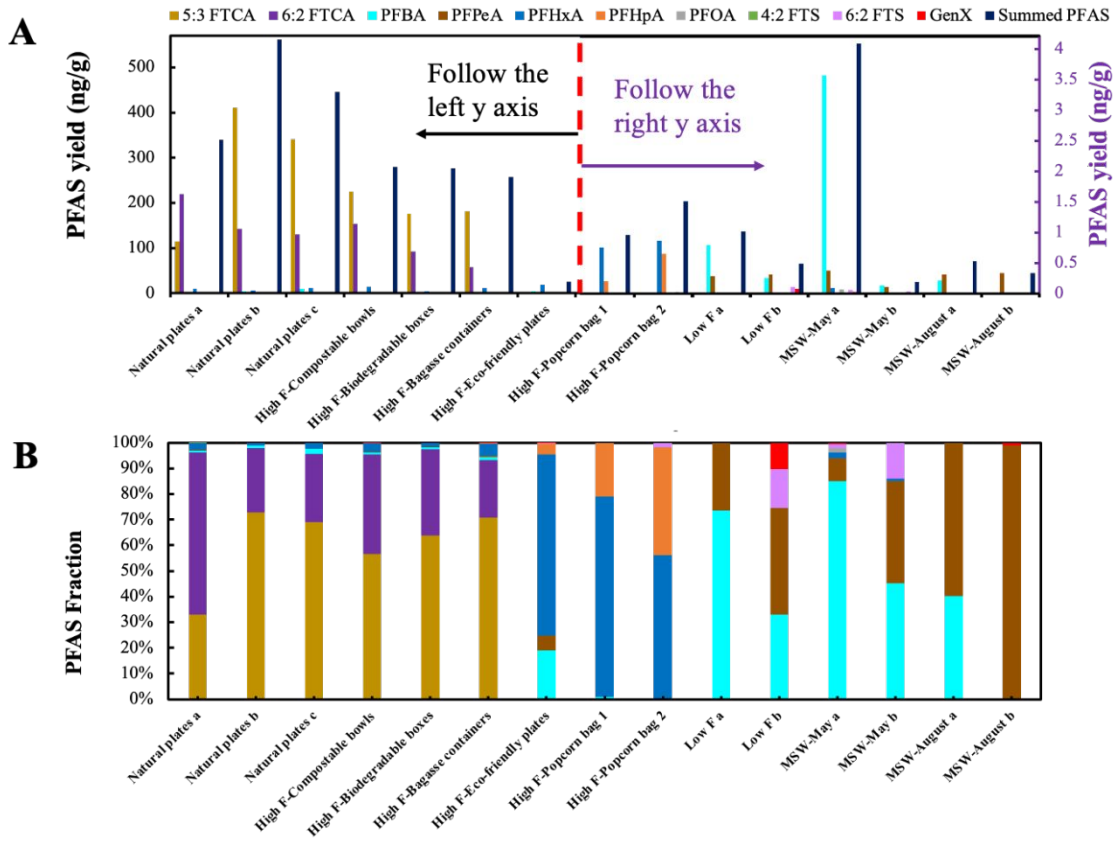

Supplement: es4c08544_si_002.pdf [file es4c08544_si_002.pdf]
